1 **Expansin-controlled cell wall stiffness regulates root growth in *Arabidopsis***

2 Marketa Samalova<sup>1</sup>, Kareem Elsayad<sup>2</sup>, Alesia Melnikava<sup>1</sup>, Alexis Peaucelle<sup>3</sup>, Evelina Gahurova<sup>1</sup>,  
3 Jaromir Gumulec<sup>4</sup>, Ioannis Spyroglou<sup>1</sup>, Elena V. Zemlyanskaya<sup>5,6</sup>, Elena V. Ubogoeva<sup>5</sup>, and Jan  
4 Hejatko<sup>1,7,\*</sup>

5  
6 <sup>1</sup> *Central European Institute of Technology (CEITEC MU), Masaryk University, Brno, Czech*  
7 *Republic*

8 <sup>2</sup> *Advanced Microscopy, Vienna Biocenter Core Facilities (VBCF), Vienna, Austria*

9 <sup>3</sup> *INRAE, Versailles-Grignon, France*

10 <sup>4</sup> *Department of Pathological Physiology, Faculty of Medicine, Masaryk University, Brno, Czech*  
11 *Republic*

12 <sup>5</sup> *Department of Natural Sciences, Novosibirsk State University, Novosibirsk, Russia*

13 <sup>6</sup> *Institute of Cytology and Genetics, Siberian Branch of Russian Academy of Sciences,*  
14 *Novosibirsk, Russia*

15 <sup>7</sup> *National Centre for Biotechnological Research, Faculty of Science, Masaryk University, Brno,*  
16 *Czech Republic*

17 \* For correspondence: [jan.hejatko@ceitec.muni.cz](mailto:jan.hejatko@ceitec.muni.cz)

18

19 **ABSTRACT**

20 Expansins facilitate cell expansion via mediating pH-dependent cell wall (CW) loosening.  
21 However, the role of expansins in the control of biomechanical CW properties in the tissue and  
22 organ context remains elusive. We determined hormonal responsiveness and specificity of  
23 expression and localization of expansins predicted to be direct targets of cytokinin signalling. We  
24 found EXPA1 homogenously distributed throughout the CW of columella/ lateral root cap, while  
25 EXPA10 and EXPA14 localized predominantly at the three-cell boundaries of epidermis/cortex in  
26 various root differentiation zones. Expression of *EXPA15*, revealing cell type-specific localization  
27 pattern, overlaps with higher CW stiffness measured via Brillouin light scattering microscopy. As  
28 indicated by both higher Brillouin frequency shift and AFM-measured Youngs' modulus, *EXPA1*  
29 overexpression upregulated CW stiffness, associated with shortening of the root apical meristem  
30 and root growth arrest. We propose that root growth in *Arabidopsis* requires delicate orchestration  
31 of biomechanical CW properties via tight regulation of various expansins' localization to specific  
32 cell types and extracellular domains.

33 **Keywords:** expansin, cytokinins, cell wall, root apical meristem, *Arabidopsis*, biomechanics,  
34 Brillouin light scattering, atomic force microscopy

35

## 36 INTRODUCTION

37 The cell wall (CW) is a fundamental component of plant cells that shapes the plant body, plays  
38 key roles in growth and development of organs, movement of solutes and nutrients and protects  
39 plants from the environment. CW developmental importance is also recognised in the control of  
40 cell differentiation and intercellular communication (Wolf *et al.*, 2012). CWs provide the strength,  
41 yet they have the ability to expand. Recent studies of growth regulatory networks suggest that the  
42 turgor-driven cell expansion is the result of a fine-tuned balance between wall relaxation and  
43 stiffening linked by a mechanosensing feedback loop (Braybrook and Jönsson, 2016; Sassi and  
44 Trass, 2015; Willis *et al.*, 2016). These regulatory networks comprise transcription factors and  
45 plant hormones and allow tight control over equilibrium between cell division and differentiation, a  
46 process fundamental for growth and development of individual organs in any multicellular  
47 organism.

48 The primary CW consists predominantly of the polysaccharides, cellulose, hemicellulose and  
49 pectins. Cellulose microfibrils provide the main load-bearing characteristics of the CW, however,  
50 the presence of hemicellulose and pectins can alter the viscoelastic properties of the wall matrix  
51 (Cosgrove, 2018; Wolf *et al.*, 2012). Once the final cell size is reached, a secondary CW can be  
52 deposited in specific cell types e.g. xylem tracheary elements (for review see Didi *et al.*, 2015) to  
53 provide additional mechanical strength. Modulation of CW mechanical properties occurs through  
54 the control of biochemical composition as well as the degree and nature of linkages between the  
55 CW polysaccharides. Interestingly, wall extensibility may be controlled at limited regions, so called  
56 'biomechanical hotspots', where cellulose-cellulose contacts are made, potentially mediated by  
57 trace amounts of xyloglucan (Cosgrove, 2014; 2018; 2018b). These relatively limited contact  
58 points between cellulose microfibrils may be key sites of a complex process allowing targeted wall  
59 expansion, the cell wall loosening.

60 Expansins, originally described as CW loosening agents during "acid growth" (McQueen-Mason  
61 *et al.*, 1992), become activated during CW acidification triggered by a number of stimuli through  
62 the plasma membrane H<sup>+</sup>-ATPase proton pump (Cosgrove, 2005). Mechanistically, expansins  
63 neither possess polysaccharide hydrolytic activity nor change composition of the CW, instead they  
64 are proposed to disrupt non-covalent bonds between cellulose and components of surrounding  
65 CW matrix, thus relaxing wall stresses and allowing turgor-driven expansion (McQueen-Mason *et al.*  
66 *et al.*, 1995; Cosgrove, 2005). *Arabidopsis thaliana* has 36 members of the expansin superfamily  
67 (Sampedro and Cosgrove, 2005) that promote CW loosening or are related to the growth of  
68 specific cells. *EXPA1* (At1g69530) is known for decades from experiments with beads loaded with  
69 purified expansin that induced bulging on the leaf-generating organ of tomato plants (Fleming *et al.*,  
70 *et al.*, 1997). Apart from leaf organogenesis (Reinhardt *et al.*, 1998) and vascular tissue  
71 differentiation (Cho and Kende, 1998), expansins are involved in root development and growth  
72 (Lee and Kim, 2013; Pacifici *et al.*, 2018; Ramakrishna *et al.*, 2019), root hair initiation (Cho and  
73 Cosgrove, 2002) and seed germination (Sanchez-Montesino, *et al.*, 2019; Ribas *et al.*, 2019).  
74 Interestingly, NbEXPA1 was shown to be plasmodesmata-specific and functions as a novel host  
75 factor for potyviral infection (Park *et al.*, 2017).

76 The importance of biomechanical interaction of cells with extracellular matrix has been  
77 demonstrated to play an important role in the specification of cell fate in animal models (Engler *et*

78 *al.*, 2006). In plants, changes in the CW mechanics are a driving force of growth and development  
79 as predicted by a number of biomechanical models (Braybrook and Jonsson, 2016; Geitmann and  
80 Ortega, 2009; Haas *et al.*, 2020; Hamant and Traas, 2010; Sassi and Traas, 2015). To name a  
81 few, *in vivo* chemical modification (demethylesterification) of homogalacturonan by pectin methyl-  
82 esterases was shown to be sufficient for the initiation of novel flower and floral organ primordia in  
83 *Arabidopsis*. *Vice versa*, inhibition of homogalacturonan demethylesterification resulted in the  
84 inhibition of normal organ formation (Peaucelle *et al.*, 2008). Importantly, demethylesterification of  
85 homogalacturonan was shown to be associated with an increase in CW plasticity as measured  
86 via atomic force microscopy (AFM), suggesting that higher elasticity of CWs might be instructive  
87 for newly formed organ primordia (Peaucelle *et al.*, 2011). In plants, the importance of  
88 biomechanical CW properties has been described mostly in the shoot tissues (Reinhardt *et al.*,  
89 1998; Pien *et al.*, 2001; Hamant *et al.*, 2008; Sampathkumar *et al.*, 2014; Landrein *et al.*, 2015;  
90 Gruel *et al.*, 2016; Hervieux *et al.*, 2017; Majda *et al.*, 2017; Takatani *et al.*, 2020). However, the  
91 biomechanical interactions associated mostly with the control of CW properties are emerging as  
92 an important mechanism guiding also root growth and development (Vermeer *et al.*, 2014; Barbez  
93 *et al.*, 2017; Pacifici *et al.*, 2018; Ramakrishna *et al.*, 2019; Hurny *et al.*, 2020).

94 Phytohormones including auxins and cytokinins, are key players in growth regulation responses  
95 and are thus determinants of plant architecture and CW development. Well known is the role of  
96 auxins in the "acid growth theory" (Cleland, 1971; Hager *et al.*, 1971), in which auxin induced  
97 extrusion of protons into the apoplast activates expansins leading to CW loosening and growth.  
98 On the other hand, cytokinins were described as factors controlling the equilibrium between cell  
99 division and differentiation (Dello Ioio *et al.*, 2007, 2008) in the root apical meristem (RAM) by  
100 positioning the auxin minimum that triggers the developmental switch (Di Mambro *et al.*, 2017).  
101 Recently, Pacifici *et al.* (2018) proposed EXPA1 as a direct target of multistep phosphorelay  
102 signalling in the cytokinin-regulated cell differentiation in the RAM.

103 Brillouin light scattering (BLS) is the inelastic scattering of light from inherent or stimulated high  
104 frequency acoustic vibrations in a sample, the speed of which is directly related to the elastic  
105 modulus of the material (Berne and Pecora, 2000). BLS microscopy is an all optical label-free  
106 spectroscopic technique that allows one to spatially map the so-called inelastic Brillouin frequency  
107 shift (BFS,  $\nu_B$ ) with near diffraction limited lateral resolution (Elsayad *et al.*, 2019; Prevedel *et al.*,  
108 2019) of live cells (Scarcelli *et al.*, 2015) and tissue (Elsayad *et al.*, 2016). Advances in Brillouin  
109 spectrometer design over the last decade (Scarcelli and Yun, 2007) have allowed for studies of  
110 live cell and tissue biomechanics at near physiological conditions. In a typical confocal Brillouin  
111 microscope, the detector is replaced by a virtually imaged phased-array (VIPA)-based Brillouin  
112 spectrometer which acquires an image of the spectrum on the electron multiplying (EM)-CCD  
113 camera. The distance of the Brillouin peaks (in GHz) from the central laser frequency is a  
114 measurement of the local mechanical properties at the confocal volume. Despite probing a distinct  
115 elastic modulus in a different frequency regime, the BLS measured has been empirically found to  
116 (semi-logarithmically) scale with the lower frequency stiffness defined via the Young's modulus,  
117 BFS can be expected to be higher for "stiffer" samples and smaller for "softer" cells and tissue  
118 (Andriotis *et al.*, 2019; Gouveia *et al.*, 2019; Scarcelli *et al.*, 2015). The Young's modulus is  
119 typically measured by atomic force microscopy (AFM). This method based on micrometer or  
120 nanometer tissue compressions (indentations) was developed to measure precisely the

121 mechanical properties of cell walls in developing organs and across entire regions of tissue  
122 (Peaucelle, 2014). The measured stiffness (resistance to deformation/ indentation) is defined by  
123 the measure of an indentation modulus that best describes the elasticity of the scaffolding of the  
124 CW of the tissue. AFM can be also used to image CW surfaces topology at high resolution to  
125 detect individual cellulose microfibrils (app. 3 nm diameter, Zhang *et al.*, 2014) and can be carried  
126 out under water allowing imaging of CW in a near-native state.

127 In this paper, we set out to localise EXPA1 and its homologues EXPA10, EXPA14 and EXPA15  
128 and describe the relationship between expansins and the mechanical properties of the CW during  
129 root cell differentiation. To quantitate the changes in CW biomechanics, we introduce mechano-  
130 optical contrast (MOC) measured via Brillouin light scattering and confirm the results using more  
131 established atomic force microscopy (AFM).

132

## 133 RESULTS

### 134 Cytokinins and auxins control *EXPAs* transcription in the *Arabidopsis* root

135 For our study we selected expansins AtEXPA1 (EXPA1, *At1g69530*), AtEXPA10 (EXPA10,  
136 *At1g26770*), AtEXPA14 (EXPA14, *At1g69530*) and AtEXPA15 (EXPA15, *At2g03090*), previously  
137 suggested to be under hormonal control (Lee *et al.*, 2007; Bhargava *et al.*, 2013; Pacifici, *et al.*,  
138 2018; Ramakrishna *et al.*, 2019).

139 According to published data (Zubo *et al.*, 2017; Pacifici *et al.*, 2018; Taniguchi *et al.*, 2007; Xie *et al.*,  
140 2018), *EXPA1* was supposed to be the direct target of cytokinin-responsive ARABIDOPSIS  
141 RESPONSE REGULATOR 1 (ARR1) and its homologues ARR10 and ARR12 (Figure 1B). *EXPA1*  
142 responsiveness to auxin could be potentially regulated by AUXIN RESPONSE FACTOR 5 (ARF5)  
143 since the corresponding DNA affinity purification (DAP)-sequencing peaks (O'Malley *et al.*, 2016)  
144 are located in its promoter (Figure 1C). To confirm the hormonal regulations over *EXPA1*, we  
145 quantified *EXPA1* transcripts using reverse transcription quantitative real-time PCR (RT qPCR) in  
146 wild-type (WT) *Arabidopsis* seedlings treated with 5  $\mu$ M 6-Benzylaminopurine (BAP) and 5  $\mu$ M 1-  
147 naphthaleneacetic acid (NAA, Figure 1A). With the cytokinin treatment, transcript levels were  
148 transiently and rather weakly (3-4 times compared to the mock-treated control) upregulated during  
149 the 4-hour time span tested; similar results were obtained using *trans*-zeatin (tZ, data not shown).  
150 Compared to that, *EXPA1* responded more distinctly to the auxin treatment and its transcript level  
151 was increased continuously up to 5–10 fold at 4h.

152 Based on our *in silico* analysis, EXPA10, EXPA14 and EXPA15 (Figure 2-figure supplement 1)  
153 might also be direct targets of cytokinin-activated type-B ARR. In line with that, both *EXPA14* and  
154 *EXPA15* were upregulated by cytokinins; nonetheless, in contrast to previous report (Pacifici *et al.*,  
155 2018), no positive response has been detected in case of *EXPA10* (both BAP and tZ, Figure  
156 2 and data not shown).

157 Altogether, our data suggest rather moderate and transient *EXPA1* and *EXPA14* upregulation by  
158 cytokinins, stronger response was seen in case of auxin- and cytokinin-mediated upregulation of  
159 *EXPA1* and *EXPA15*, respectively. However, no clear effect of exogenous hormone application  
160 was detectable for *EXPA10*.

## 161 **Expansins localise to the root CW in a specific pattern**

162 Previously, expansins were shown to be localised in the CW by immunogold labelling of CWs and  
163 Golgi-derived vesicles using antibody against  $\alpha$ -expansin (Cosgrove *et al.*, 2002). However, so far  
164 attempts to visualise expansins in the CW of living plants by a translational fusion with a green  
165 fluorescent protein (GFP) failed (Pacifci *et al.*, 2018), perhaps due to high sensitivity of GFP to  
166 the low pH environment. Therefore, we created translational fusions of EXPA1, EXPA10, EXPA14  
167 and EXPA15 with a red fluorescent protein mCherry (Shaner *et al.*, 2004) under the control of  
168 native promoters and confirmed their CW localisation in a highly tissue-specific manner in roots  
169 (Figures 1 and 3).

170 In *Arabidopsis* root, *EXPA1* revealed the strongest expression in the columella and lateral root  
171 cap (LRC) of both the main and lateral roots (Figure 1D-G). Interestingly, the cells immediately  
172 surrounding developing lateral roots and primordia were also strongly expressing *EXPA1* (Figure  
173 1G). These results were confirmed using an independent transcriptional *pEXPA1::nls:3xGFP*  
174 fusion line (Ramakrishna *et al.*, 2019) crossed into the mCherry line background (Figure 1F and  
175 1G). Occasionally, very weak *EXPA1* promoter activity was detectable in the root transition zone  
176 (TZ)/elongation zone (EZ) boundary (Figure 1 – figure supplement 1A); however, no  
177 *EXPA1*:mCherry was detectable there (Figure 1 – figure supplement 1B).

178 *EXPA10* was visibly expressed in the cortex layer of the primary root from the meristematic zone  
179 up (proximally) to the first lateral roots (Figure 3A). Unlike *EXPA1*, *EXPA10* is not expressed in  
180 the lateral root cap. Interestingly, in contrast to a rather homogenous distribution of *EXPA1*  
181 throughout the CW surrounding the LRC/columella cells, we observed distinct “spotty” localisation  
182 of *EXPA10* dominantly in the cortex/endodermis and cortex/epidermis three-cell boundaries that  
183 was particularly visible on the cross-sections of the roots (Figure 3A, insets I-III.). This kind of  
184 unequal distribution of *EXPA10* in the three-cell boundaries was occasionally detectable also in  
185 the longitudinal plane view of the root cortex cell files. Here, the positions of *EXPA10* localization  
186 maxima do not seem to overlap with cellulose deposition as detected using calcofluor white  
187 staining of fixed roots (Figure 3 – figure supplement 1, white arrows). In the lateral roots, the  
188 *EXPA10*:mCherry fusion seems to be mostly localised in the transition/elongation zones  
189 predominantly in the epidermis and cortex layers (Figure 3B and inset IV.).

190 *EXPA14*:mCherry fusion localises in the cortex layer of the RAM up to the TZ/EZ boundary, after  
191 which the signal disappears (Figures 3C, D). The distinct pattern of strong accumulation of the  
192 protein in the apoplastic space at the boundary of three cells (insets for Figure 3C and 3E, Figure  
193 3-figure supplement 2A) resembles the one observed for *EXPA10*:mCherry fusion. In the lateral  
194 roots, *EXPA14* is also strongly expressed in the transition/elongation zones (Figure 3E). However,  
195 in contrast to the situation in the main root, in the lateral root *EXPA14* locates not only to cortex,  
196 but also to the epidermal cell layers (Figure 3E inset II.). *EXPA15*:mCherry is localised in the  
197 epidermis of RAM (Figure 3F) and emerging lateral roots (Figure 3G, Figure 3 - figure supplement  
198 2B) in a relatively uniform pattern; however, the “spotty” pattern was apparent in the more internal  
199 cortex/endodermis. Proximally from the meristematic zone, *EXPA15* re-localises into deeper  
200 (vasculature) layers, again revealing rather homogenous distribution (Figure 3H insets I-II.).

201 Worth of note, in contrast to homogenously distributed EXPA1 and (partially) EXPA15, EXPA10  
202 and EXPA14 seem to be localized dominantly in the longer (parallel with the longitudinal root axis)  
203 walls of elongated cells, particularly in the RAM of the main root (Figure 3 – figure supplement 3).

204 To confirm the extracellular localisation, we activated the (naturally very weak) expression of  
205 *EXPA1:Cherry* in all plant tissues (Figure 4) using the dexamethasone (Dex) inducible system  
206 pOp6/LhGR (Craft *et al.*, 2005; Samalova *et al.*, 2005; Samalova *et al.*, 2019). After both long (7  
207 days) and short (24 h) Dex induction, the fusion protein accumulated in the cell  
208 periphery/apoplastic space in roots but was also visible in the transit through the secretory  
209 pathway from the endoplasmic reticulum (ER) to the CW. However, since the resolution of a  
210 confocal microscope does not allow to distinguish between CW and plasma membrane  
211 localisation, we treated the roots with 10% sorbitol to allow for plasmolysis. Figure 4G shows that  
212 unlike the plasma membrane marker (Figure 4-figure supplement 1), EXPA1:mCherry remained  
213 located at the outer edges of the cells, suggesting that EXPA1 is indeed localised in the cell wall.  
214 Importantly, the CW localization pattern we observed in case of the Dex-induced  
215 pRPS5A>GR>EXPA1:mCherry line was still resembling the homogenous distribution we  
216 observed in case of EXPA1:mCherry driven by its natural promoter in the lateral root cap tissue  
217 (compare Figures 1 and 4). This is suggesting that the CW localization pattern of EXPA1 is  
218 independent of the cell type and the level of expression.

219 To conclude, all assayed expansins show distinct expression and localization patterns. The  
220 differences in the localization pattern between EXPA1 revealing homogenous distribution all  
221 around the cell and the “spotty” localization of EXPA10, EXPA14 and (partially) EXPA15 implies  
222 differential roles in the control over root CW properties.

### 223 **Introducing mechano-optical contrast for Brillouin-based imaging of biological samples**

224 To investigate the biomechanical properties on the sub-cellular level we used Brillouin light  
225 scattering (BLS) microscopy. The Brillouin frequency shift ( $\nu_B$ ) is proportional to the acoustic  
226 phonon velocity, which is in turn proportional to the square root of the high frequency longitudinal  
227 elastic modulus (M). As such, the Brillouin frequency can serve as a proxy for the mechanical  
228 properties of the sample. In particular M is closely related to the compressibility of the sample, and  
229 has empirically been observed to scale semi-logarithmically with the Young’s modulus (E) as  
230 measured by AFM in diverse samples including live cells (Scarcelli *et al.*, 2015). An exact  
231 calculation of M requires knowledge of the ratio  $n^2/\rho$  where  $n$  and  $\rho$  are the refractive index and  
232 mass density in the probed region of the sample respectively. While it can by virtue of the Lorentz-  
233 Lorenz (LL) relation often be assumed that  $n^2$  will scale with  $\rho$  (Zhao *et al.*, 2011) such that explicit  
234 knowledge of the ratio  $n^2/\rho$  at each probed region is not required, the validity of the LL-relation in  
235 complex multicomponent structures such as the cell wall cannot be rigorously justified. As such,  
236 we present results in terms of a dimensionless frequency shift we term the *Mechano-Optical*  
237 *Contrast* (MOC),  $\nu'_B = \nu_B / \nu_B^{(w)}$ , where  $\nu_B^{(w)}$  is the measured BLS frequency of distilled water  
238 (Antonacci *et al.*, 2020). As is the case for the Brillouin frequency shift, the MOC will scale as the  
239 square root of M, with the advantage that it is independent of the probing wavelength, can correct  
240 for slight variations in temperature between measurements, and allows for better straight forward  
241 comparisons of measurements between instruments employing different probing wavelengths.

## 242 **EXPA1 controls biomechanical properties of the CW**

243 To characterize its functional importance, we overexpressed *EXPA1* (without any tag) and  
244 generated pRPS5A>GR>EXPA1 Dex-inducible lines (8-4 and 5-4) using the pOp6/LhGR system  
245 as above. Representative 2D Brillouin frequency shift maps (Figure 5A) display the BLS shift in  
246 the CW of plants overexpressing *EXPA1* before and after induction. We quantified the MOC in  
247 roots (early EZ) of 7-day old *Arabidopsis* WT and *EXPA1* overexpressing seedlings (line 8-4)  
248 grown on MS media pH 5.8 or pH 4 (Figure 5B and C, respectively) with or without Dex induction.  
249 From the technical reasons (to obtain sufficient overlap of point spread function with cell wall and  
250 hence good cell wall signal) and the expression profile of assayed *EXPA* genes (epidermis and/or  
251 cortex), we focused on the longitudinal inner epidermal CWs (epidermis/cortex boundary). The  
252 plants overexpressing *EXPA1* showed a higher MOC (longitudinal elastic modulus, *vide supra*) for  
253 the root CWs on both pH media, suggesting that their CWs are stiffer. The  
254 pRPS5A>GR>EXPA1:mCherry lines induced on Dex also displayed higher MOC, however not  
255 significantly different from the non-induced plants (Figure 5 - figure supplement 1A), perhaps due  
256 to lower expression levels of the *EXPA1* (Figure 5 - figure supplement 2). Importantly, we have  
257 detected increase in the MOC/cell wall stiffness even in response to short-term Dex-mediated  
258 *EXPA1* upregulation. For the strong expression line pRPS5A>GR>EXPA1 (8-4), the statistically  
259 significant change was observed as soon as 3 h after *EXPA1* induction (Figure 5D, E) on media  
260 at both pH tested (4 and 5.8). In case of weaker expressing line pRPS5A>GR>EXPA1:mCherry  
261 (1-3), the significant increase in MOC was detected later, after 6 h of induction and only on the  
262 media with pH 4.0 (Figure 5 - figure supplement 1B). To exclude the unspecific/side effects of  
263 gene overexpression, we determined the spatial map of cell stiffness using fluorescence  
264 emission-Brillouin imaging (Elsayad *et al.*, 2016) in the larger area of *Arabidopsis* root in a  
265 pEXPA15::EXPA15:mCherry line, revealing stronger mCherry signal when compared to  
266 pEXPA1::EXPA1:mCherry. The regions of higher Brillouin frequency shift correlated well with  
267 *EXPA15* expression domain (Figure 6), suggesting the role of EXPA15 in the control of cell wall  
268 stiffness.

269 Since the refractive index (RI) in cells directly correlates with the mass content, we applied  
270 quantitative cell tomography (employing a holotomographic microscope) to measure the RI  
271 directly in the *Arabidopsis* roots in water. Representative maximum intensity projections of RI  
272 tomograms are shown in Figure 7A. The extracted data confirmed that there are no statistically  
273 significant differences across all genotypes and treatment performed in both longitudinal (upper  
274 graphs) and transverse (lower graphs) cell walls of the early elongating cells in *Arabidopsis* roots  
275 grown at both pH 5.8 and 4 (Figures 7B, C).

276 To directly measure the “stiffness” of root CWs, we used atomic force microscopy (AFM). AFM-  
277 based microindentations apply precise known forces on a cell through a cantilever and give a  
278 deformation value to extract cell Young’s modulus (Peaucelle, 2014; Peaucelle *et al.*, 2015). In a  
279 complex structure of plant tissues, at small deformation the force to deform material is proportional  
280 to the area of indentation allowing the determination of a coefficient of proportionality that is named  
281 “apparent Young’s modulus” (Peaucelle, 2014). This coefficient depends on the speed of  
282 deformation and mechanical characteristics of the sample. Representative heat maps of the  
283 apparent Young’s modulus ( $E_A$ ) show clear differences in  $E_A$  measured in the CW of root early EZ  
284 in 7-day old *Arabidopsis* WT and *EXPA1* overexpressing seedlings (Figure 8A). The data

285 quantification confirms that the Dex-induced *EXPA1* associates with significantly stiffer roots  
286 ( $P < 0.001$ ) on growth media at pH 5.8 or pH 4 (Figure 8B and C, respectively). The stiffening effect  
287 of *EXPA1* overexpression thus seems to be observable at indentation speed of seconds and at  
288 the GHz through the Brillouin technique.

289 To wrap up, overexpression of *EXPA1* results into stiffening of the CWs measured at the TZ/EZ  
290 boundary using both Brillouin light scattering and AFM. Interestingly, even the natural *EXPA15*  
291 expression seems to associate with cells revealing higher stiffness within the *Arabidopsis* root tip.

### 292 ***EXPA1* overexpression downregulates root growth by reducing RAM size**

293 We examined the phenotype of WT and *EXPA1* overexpressing seedlings (pRPS5A>GR>*EXPA1*  
294 lines 5-4 and 8-4) grown on Dex continuously for 1 week. The Dex-induced plants had significantly  
295 reduced length of roots by 25-30% (Figures 9A, B). The reduction was further enhanced to 40-  
296 73% when the pH of the growth media was dropped from 5.8 to 4. A detailed examination of the  
297 RAM together with the TZ revealed that the size was significantly reduced by 18% and 29% for  
298 the line 8-4 grown on media with normal (5.8) and acidic (4) pH, respectively (Figures 9C).  
299 Similarly, the number of the cells (counted in the cortex layer from the quiescent centre to the first  
300 elongated cell) was significantly reduced (Figure 9D). However, the ratio size/number of cells  
301 remained the same for each line with or without Dex induction (Figure 9E), suggesting that the  
302 number of the cells, but not the cell length is reduced in the smaller roots.

303 To determine the possible mechanism of root shortening in more details, we assayed the impact  
304 of *EXPA1*-overexpression on the longitudinal root zonation. Here, we used the cell morphology  
305 criteria as defined by Takatsuka *et al.* (2018). Our data show that while the number of cells in the  
306 TZ remained similar to those of WT, the number of cells in the RAM was significantly reduced  
307 upon *EXPA1* overexpression (Figure 9 E, F).

308 In contrast to previous reports, in our hands *exp1-1* (Pacifci *et al.*, 2018), *exp1-2* (Ramakrishna  
309 *et al.*, 2019) as well as our Dex-inducible amiRNA (amiEX1 lines), designed to downregulate  
310 *EXPA1* and closely related *EXPA14* and *EXPA15*, did not display any significant phenotype in  
311 terms of root or RAM size (Figure 9 - figure supplement 1). However, it should be noted here that  
312 the amiEX1 lines only reduced the *EXPA1* expression after Dex induction by app. 50%, *EXPA14*  
313 by 60% and *EXPA15* by 90% (tested by RT qPCR, data not shown).

314 Taking together, while we do not see any effect of *EXPA1* absence/downregulation on the root  
315 growth and/or RAM size, the overexpression of *EXPA1* results into reduction in a number of  
316 proliferating cells in the root meristem, thus slowing down the growth of the *Arabidopsis* root.

317

## 318 **DISCUSSION**

### 319 **Is there a role for hormonal regulation over *EXPA1* in the root growth?**

320 Recently, the role of *Arabidopsis* *EXPA1* was described in the early stages of lateral root formation  
321 (Ramakrishna *et al.*, 2019) and in the control of cell differentiation (expressed as a function of cell  
322 elongation) in the cells leaving meristematic zone of RAM (Pacifci *et al.*, 2018). In the latter work,  
323 the authors proposed cytokinin-mediated upregulation of *EXPA1* and two genes encoding H<sup>+</sup>ATP-



324 ases in the root TZ/EZ boundary and in the RAM, respectively, as a mechanism of cytokinin-  
325 induced cell differentiation. Pacifici *et al.* (2018) reported expansion of RAM in the *expa1-1*  
326 background compared to the WT. Furthermore, the authors claimed that the phenotype could be  
327 rescued in the presence of construct for translational fusion of EXPA1 with GFP  
328 (pEXPA1::EXPA1:GFP), suggesting functionality of the construct even though no GFP signal  
329 could be detected. In line with more recent study (Ramakrishna *et al.*, 2019), we did not observe  
330 any statistically significant change in the root length and/or RAM size in the *expa1-1*,  
331 CRISPR/Cas9 line *expa1-2* and our amiRNA lines. However, it should be noted here that *exp1-2*  
332 is hypomorphic allele (Ramakrishna *et al.*, 2019) and our amiRNA lines are knock-down (not  
333 knock-out) lines. In contrast to Pacifici *et al.* (2018), we also did not observe the EXPA1:mCherry  
334 outside the columella/LRC in the root tip and the promoter activity (pEXPA1::nls:3xGFP) was only  
335 occasionally seen in the TZ/EZ boundary and in the elongated cells proximally to that. Finally,  
336 cytokinins only weakly and transiently activated *EXPA1* transcription when assayed in the entire  
337 roots using RT qPCR, while no statistically significant upregulation was detectable (using absolute  
338 fluorescence measurement) in the RAM using the pEXPA1::EXPA1:mCherry line after 4h  
339 treatment with Both BAP and NAA (data not shown). These findings are suggesting that the  
340 cytokinin-mediated transcriptional regulation may take place in other parts of the root (e.g. cells  
341 surrounding LR primordia). Similarly to us, Pacifici *et al.* (2018) also did not see the cytokinin-  
342 dependent regulation in the columella/LRC and claim that *ARR1* mediates the cytokinin control  
343 over *EXPA1* expression specifically in the TZ/EZ boundary. Considering the *EXPA1* expression  
344 potentially taking place in the TZ/EZ boundary would represent negligible proportion of the entire  
345 expression of *EXPA1* in the root, its developmental importance is rather questionable and seems  
346 unlikely to be responsible for the observed (3-4 times) upregulation of *EXPA1* transcript in the  
347 *Arabidopsis* root. Based on our data, we suggest the role of EXPA1 in the control of RAM size,  
348 but probably in a concert with other EXPAs and dominantly in the columella/LRC (*vide infra*). The  
349 role of (cytokinin-regulated) auxin accumulation in the LRC in the control of RAM size has been  
350 proposed recently (Di Mambro *et al.*, 2019). However, even in case of more distinct transcriptional  
351 regulation of *EXPA1* by NAA, we do not see any significant and consistent *EXPA1* upregulation  
352 in the LRC, both at the level of promoter activity or EXPA1 protein (data not shown), thus leaving  
353 the functional importance of cytokinin- and auxin-mediated regulation over *EXPA1* in the root tip  
354 rather unclear.

### 355 **EXPA localization and control of CW properties**

356 In the previous studies, expansins were located to the CWs using immunolocalization techniques  
357 of fixed plant materials (Zhang and Hasenstein, 2000; Cosgrove *et al.*, 2002; Balestrini *et al.*,  
358 2005). The transgenic lines carrying *EXPA* genes in a translational fusion with mCherry allowed  
359 observing localization of EXPA proteins, to our knowledge for the first time, in living plants.  
360 Interestingly, our data suggest that assayed *EXPAs* differ not only in the spatiotemporal specificity  
361 of expression, but their protein products reveal also distinct localization pattern in specific domains  
362 of the root apoplast. Firstly, we see localization of EXPA10 and EXPA14 dominantly in the  
363 longitudinal CWs of elongated root cells. This is resembling the situation observed in maize xylem,  
364 where the signal obtained after immunolocalization using anti-cucumber expansin antibody was  
365 homogenously distributed in the isodiametric (non-elongated) xylem cells, while located  
366 dominantly to the longitudinal CWs of elongated xylem (Zhang and Hasenstein, 2000). Secondly,

367 EXPA10, EXPA14 and (partially) EXPA15 located in a punctuate pattern, spatially colocalizing  
368 with the three-cell boundaries, possibly surrounding the intercellular space. Plant as well as  
369 bacterial expansins were found to bind cellulose rather weakly (McQueen-Mason and Cosgrove,  
370 1995), in case of bacterial EXLX1 via hydrophobic interactions (Georgelis *et al.*, 2011). Much  
371 stronger affinity was observed between expansins and components of the CW matrix, including  
372 pectin and hemicelluloses (McQueen-Mason and Cosgrove, 1995; Georgelis *et al.*, 2011). These  
373 and other evidence, e.g. the ability of expansins to mechanically weaken pure paper (McQueen-  
374 Mason and Cosgrove, 1994) led to a conclusion that ‘expansins bind at the interface between  
375 cellulose microfibrils and matrix polysaccharides in the wall and induce extension by reversibly  
376 disrupting noncovalent bonds within this polymeric network’ (McQueen-Mason and Cosgrove,  
377 1995). In the same study, the authors propose that ‘a minor structural component of the matrix,  
378 other than pectin and xyloglucan, plays an important role in expansin binding to the wall and,  
379 presumably, in expansin action’ (McQueen-Mason and Cosgrove, 1995). In a more recent work  
380 using solid-state nuclear magnetic resonance (NMR) in a combination with differential isotopic  
381 labelling of expansin and polysaccharides, Wang *et al.* (2013) discovered that expansin binds  
382 highly specific cellulose domains enriched in xyloglucan, while the previously reported and more  
383 abundant binding to pectins doesn’t seem to relate to its activity. Our results imply existence of a  
384 factor determining specific localization of individual EXPAs in different CW compartments,  
385 particularly those revealing the specific “spotty” localization. The homogenous distribution of  
386 EXPA1 throughout the CWs even outside its natural expression domain as seen in the  
387 pRPS5A>GR>EXPA1:mCherry line is suggesting that the specific localization pattern is not cell-  
388 type specific, but rather encoded in the EXPAs amino acid sequence. The absence of  
389 colocalization of EXPA10 with calcofluor white staining in the fixed *Arabidopsis* root is implying  
390 that the factor could be a component of the CW matrix other than cellulose. The existence of the  
391 putative factor responsible for targeting subset of EXPAs into specific apoplast domains and its  
392 (molecular and/or biophysical) nature, however, remains elusive.

393 *Arabidopsis* genome contains 26 genes for  $\alpha$ -expansins (Li *et al.*, 2002), suggesting functional  
394 diversification within the subfamily. Specific expression and localization of EXPA1, EXPA10,  
395 EXPA 14 and EXPA15 together with differential hormonal sensitivity implies possible crosstalk  
396 among the individual expansins. Concert in their targeted action in the apoplastic continuum  
397 encapsulating the individual cells might result into the final vectorial change of CW expansion and  
398 highly coordinated cellular behaviour underlying root growth including its longitudinal zonation.  
399 Similar functional and spatiotemporal specificity including differential hormonal response and  
400 shoot cell growth-based zonation was described for *LeEXP2*, *LeEXP9* and *LeEXP18* in tomato  
401 (Caderas *et al.*, 2000; Vogler *et al.*, 2003). Using both Brillouin light scattering imaging and AFM  
402 we have shown that overexpression of *EXPA1*, homogeneously distributed throughout the CW,  
403 results into increased CW stiffness in the root cells. That suggests that deregulating the tightly  
404 controlled equilibrium of specific expression and localization of individual EXPAs probably disturbs  
405 the naturally occurring strain/stress distribution within the growing *Arabidopsis* root that is reflected  
406 in the increased stiffness of the root cells and consequently root growth arrest. This might be  
407 analogous to the situation observed after misregulation of bipolar distribution of pectin  
408 methylesterase activity in the *Arabidopsis* hypocotyls. Peaucelle *et al.* (2015) demonstrated  
409 asymmetric loosening of longitudinal, as compared to transverse (anticlinal) walls just before the  
410 cell starts to elongate, even preceding the cortical microtubule reorientation, considered as a

411 reporter of CW tensions (Hamant *et al.*, 2019). It is achieved via asymmetric pectin de-  
412 methylesterification, as reliably shown via immunolabeling of low degree of homogalacturonan  
413 methylesterification in epidermal hypocotyl CWs using 2F4 antibody. As anticipated, manipulation  
414 of homogalacturonan de-methylesterification through the inducible overexpression of the pectin  
415 methylesterase (PME5oe) or the PME inhibitor 3 (PMEI3oe) significantly increased or reduced  
416 2F4 signal, respectively. That associated with reduction/increase of the overall cell stiffness in  
417 PME5oe/PMEI3oe plants. However, in both cases, the loss of asymmetry in the CW matrix  
418 composition and its biomechanical properties led to the similar effect, i.e. loss of cell expansion.  
419 Similar mechanism i.e. disturbing the tightly regulated spatial distribution of individual expansins  
420 might be the reason of contrasting effects of expansins overexpression, frequently associated with  
421 upregulated CW expansion, but sometimes leading to the opposite effect. i.e. cell growth inhibition  
422 (Caderas *et al.*, 2000; Cho and Cosgrove, 2000, 2002; Choi *et al.*, 2003; Vogler *et al.*, 2003;  
423 Zenoni *et al.*, 2011; Goh *et al.*, 2014). Besides the specific localization into individual cell types  
424 and within apoplast subdomains, another factor contributing to the final effect of expansin  
425 overexpression on cell growth could be the sensitivity of a given tissue. It has been reported that  
426 in contrast to young apical cells, the more differentiated non-growing cells of cucumber hypocotyls  
427 are insensitive to expansin-induced CW loosening (McQueen-Mason *et al.*, 1992). Going more in  
428 that direction, based on the imperfect correlation between expansin activity and cell growth,  
429 existence of hypothetical factor was proposed (Caderas *et al.*, 2000), acting in concert with  
430 expansins and possibly delimiting cell growth under some physiological conditions.

431 According to the loosening theory in a well-hydrated non-growing cell, the cell reaches osmotic  
432 equilibrium, with wall stresses counter-balancing the outward force of turgor pressure against the  
433 wall. However, growing CWs are loosened which refers to a shift or cut of a load-bearing part of  
434 the wall, relaxing tensile stress in the entire wall and simultaneously reducing cell turgor. As a  
435 result, water flows into the cell, elastically expanding the wall and restoring turgor and wall stress  
436 (Cosgrove, 2018b). CWs may become mechanically softer (meaning more easily deformed by  
437 mechanical force), but they do not necessarily result in an increase in wall relaxation and growth,  
438 e.g, lytic enzymes may soften CW but do not stimulate cell growth. On the other hand,  $\alpha$ -expansins  
439 cause stress relaxation and prolonged enlargement of CWs, but they lack wall lytic activity and  
440 they do not soften the wall, as measured by tensile tests (Cosgrove 2018b, Wang and Cosgrove,  
441 2020). An example of such observations was made by Wang and Cosgrove (2020) with pectin  
442 methylesterase (PME) that selectively softened the onion epidermal wall yet reduced expansin-  
443 mediated creep. After enzymatic de-esterification (without added calcium), the onion epidermal  
444 wall swelled and became softer, as assessed by nanoindentation (AFM) and tensile plasticity  
445 tests, yet exhibited reduced acid-induced creep. Accordingly,  $\alpha$ -expansins were shown to act via  
446 different mechanism as compared to enzymes inducing CW creep via modifying CW matrix.  
447 Compared to CW loosening mediated by fungal endoglucanase Cel12A, expansins do induce CW  
448 loosening that is not associated with changes in the tensile stiffness (neither elastic nor plastic  
449 compliance), suggesting different way of action (Yuan *et al.*, 2001). Another example is de-  
450 esterification of homogalacturonan (HG) that is thought to stiffen pectin gels and primary CWs by  
451 increasing calcium crosslinking between HG chains. Contrary to this idea, recent studies  
452 (Braybrook and Peaucelle, 2013; Peaucelle *et al.*, 2015) found that HG de-esterification correlated  
453 with reduced stiffness of living tissues, measured by surface indentation. The physical basis of  
454 such apparent wall softening is unclear, but possibly involves complex biological responses to HG

455 modification. Indeed, feedback mechanisms and other factors regulating CW remodelling genes  
456 evoked by CW integrity pathway sensors often complicate the interpretation of CW mutant lines  
457 (Gigli-Bisceglia *et al.*, 2018).

458 In terms of the methodological approach used, there are important differences between the  
459 longitudinal elastic modulus (M) measured by Brillouin light scattering and the Young`s modulus  
460 (E) measured via AFM (Prevedel *et al.*, 2019). The BLS measured M is well known to be very  
461 sensitive to the level of hydration (Palombo *et al.*, 2014; Wu *et al.*, 2018; Androtis *et al.*, 2019) and  
462 temperature (Berne and Pecora, 2000), and any comparisons have thus to be made under the  
463 same thermodynamic conditions and hydration levels. However, as these can be assumed to be  
464 similar between the different samples measured, variations between samples can be interpreted  
465 as being due to changes in the mechanical properties in the probed regime. The comparable trend  
466 of the AFM measured quasi-static Young`s Modulus and BLS measured MOC observed here, is  
467 consistent with observations in other diverse biological samples (e.g. Andriotis *et al.*, 2019;  
468 Gouveia *et al.*, 2029; Scarcelli *et al.*, 2015) suggesting that here too the latter may serve as a  
469 proxy for stiffness. We note, however, that at very high hydration levels (much higher than in the  
470 system studied here), any relation between the two can be expected to break down (Wu *et al.*,  
471 2018).

472 One possible interpretation of the unexpected increase of CW stiffness upon *EXPA1*  
473 overexpression is the aforementioned disturbance of the coordinated equilibrium in the CW  
474 tensions across the *Arabidopsis* root and tissue-wide mechanical conflicts, shown to be an  
475 important morphogenic mechanism involved in the petal development in snapdragon (Rebocho *et al.*,  
476 2017). That might result to the general block in the CW extensibility, possibly potentiated via  
477 proposed mechanosensitive feedback loop (Uyttewaal *et al.*, 2012), leading to absence of CW  
478 relaxation and thus increased stiffness. However, our large area mapping of CW stiffness using  
479 fluorescence emission–Brillouin imaging at small magnification implies colocalization of natural  
480 *EXPA15* expression with regions of higher stiffness. This is implying a possible role for cell  
481 stiffening even in case of endogenous expansins. Nonetheless, the molecular/biophysical  
482 mechanism underlying this contra intuitive effect remains to be clarified.

## 483 **Conclusions**

484 Based on our and others` results (*vide supra*), we suggest that the tightly controlled spatiotemporal  
485 specificity of expansin expression in a combination with localisation of their protein products into  
486 distinct domains of plant extracellular matrix, together with hormone-regulated pH distribution  
487 within the root apoplast (Barbez *et al.*, 2017), plays an important regulatory role controlling the  
488 root growth and development in *Arabidopsis*. Similar concept suggesting the role of regular (i.e.  
489 controlled) distribution of mechanically stiff regions in the extracellular matrix for the proper  
490 transcriptional regulation and actin-dependent cellular adhesion associated with stem cell fate  
491 determination was published in animal system (Yang *et al.*, 2016).

492 The expansin-mediated regulation of the biomechanical CW properties seems to be associated  
493 with subsequent mechanoperception-mediated feedback loop, leading to genome-wide changes  
494 in the expression profiles of individual cells, probably in a cell type-specific context (Ilias *et al.*,  
495 2019). However, our results on the short-term induction of *EXPA1* expression associated with

496 prompt increase in the CW stiffness imply that the non-transcriptional regulation will be an  
497 important mechanism underlying EXPA(1)-controlled CW biomechanics and root growth.

498 Upregulated *EXPA1* associated with CW stiffness seems to downregulate root growth via  
499 downregulating RAM size. This is suggesting a mechanism connecting biomechanical CW  
500 properties with the control over cell division in the RAM. Whether the mechanism includes the CW  
501 integrity signalling, previously shown to control cell division in the RAM in a response to the  
502 inhibition of cellulose biosynthesis (Gigli-Bisceglia *et al.*, 2018), remains to be identified.

503

## 504 **ACKNOWLEDGEMENT**

505 M.S. has received funding from the European Union's Horizon 2020 research and innovation  
506 programme under the Marie Skłodowska-Curie co-financed by the South Moravian Region under  
507 grant agreement No. 665860. This study reflects only the author's view and the EU is not  
508 responsible for any use that may be made of the information it contains. The work was further  
509 supported by the Ministry of Education, Youth and Sports of CR from European Regional  
510 Development Fund-Project "Centre for Experimental Plant Biology": No.  
511 CZ.02.1.01/0.0/0.0/16\_019/0000738, LTAUSA18161 and LTC19047 and Czech Science  
512 Foundation (19-24753S). K.E. acknowledges support from the City of Vienna and the Austrian  
513 Ministry of Science (Vision 2020). The work of E.V.Z. and E.V.U. was supported by the Russian  
514 Science Foundation (20-14-00140) and the Russian State Budget (0324-2019-0040). We  
515 acknowledge Plant Sciences and Cellular Imaging CFs at CEITEC MU supported by MEYS CR  
516 (LM2018127). RIAT-CZ project (ATCZ40) funded via Interreg V-A Austria – Czech Republic is  
517 gratefully acknowledged for the financial support of the measurements at the Vienna Biocenter  
518 CF Advanced Microscopy. We thank to Ive De Smet for his kind donation of the pEXP1::nls:3xGFP  
519 and CRISPR/Cas9 *exp1-2 Arabidopsis* lines and Victoria Mironova for critical reading of the  
520 manuscript.

521

## 522 **FIGURES AND FIGURE LEGENDS**

## FIGURE 1

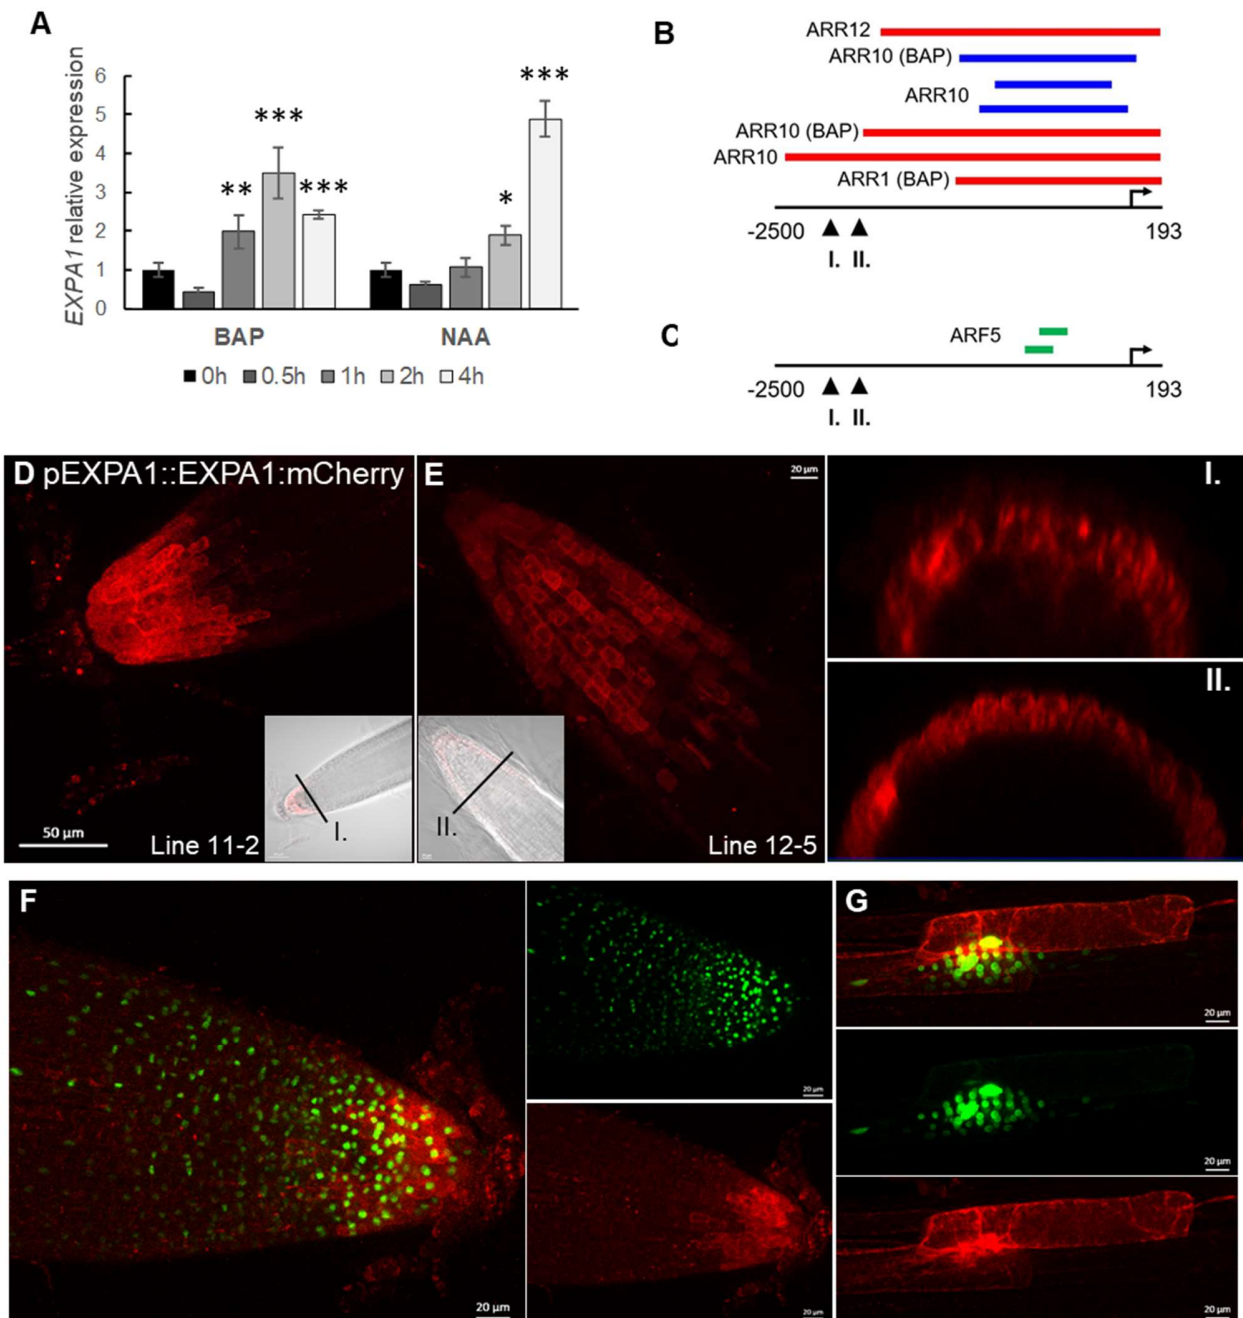

523  
 524 **Figure 1: Transcript profiling of *EXPA1* in response to hormones, *EXPA1* promoter analysis**  
 525 **and confocal imaging of fluorescently labelled fusions.**

526 **(A)** Quantitative real-time PCR of roots of 7-day old *Arabidopsis* WT seedlings treated with 5 μM  
 527 BAP or 5 μM NAA for 0.5h, 1h, 2h and 4h. The transcript abundance of *EXPA1* is normalized to  
 528 non-treated seedlings and relative to constitutively expressed *UBQ10*. The experiment was  
 529 repeated twice with 3 replicas of each sample, error bars represent SD. Stars indicate statistically

530 significant differences. **(B)** *EXPA1* promoter analysis identifies ChIP-seq and DAP-seq-derived  
531 binding events for transcription factors involved in cytokinin and **(C)** auxin signalling pathways.  
532 Red, blue and green colours depict the peaks from Xie *et al.*, 2018, Zubo *et al.*, 2017 and O'Malley  
533 *et al.*, 2016, respectively. The coordinates are represented relative to the transcription start site  
534 marked by the arrow. The arrowheads indicate the beginning of the *pEXPA1* promoter in (I.) this  
535 publication and (II.) Pacifici *et al.*, 2018. **(D)** Z-stack projections of pEXPA1::EXPA1:mCherry  
536 fusion localised in the LRC of two independent lines 11-2 and **(E)** 12-5 and their transversal xz  
537 optical sections (I. and II.) as indicated by the black lines in the transmitted-light micrograph inserts  
538 shown as a single optical section. **(F)** Z-stack projections of F1 line pEXPA1::EXPA1:mCherry (11-  
539 2) crossed with pEXPA1::nls:3xGFP illustrating a similar pattern of *EXPA1* expression by GFP  
540 (green) and mCherry (red) signals in RAM and **(G)** in a lateral root primordium. Scale bars are 20  
541  $\mu\text{m}$  except in D is 50  $\mu\text{m}$ .

542

## FIGURE 2

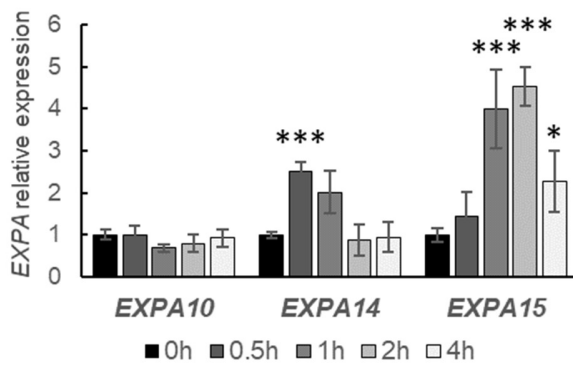

543

544 **Figure 2: Transcript profiling of *EXPA10*, *EXPA14* and *EXPA15* in response to a cytokinin**  
545 **treatment.**

546 Quantitative real-time PCR of roots of 7-day old *Arabidopsis* WT seedlings treated with 5  $\mu\text{M}$  BAP  
547 for 0.5h, 1h, 2h and 4h. The transcript abundance of the *EXPAs* is normalized to non-treated  
548 seedlings and relative to constitutively expressed *UBQ10*. The experiment was repeated twice  
549 with 3 replicas of each sample, error bars represent SD. Stars indicate statistically significant  
550 differences.

**FIGURE 3**

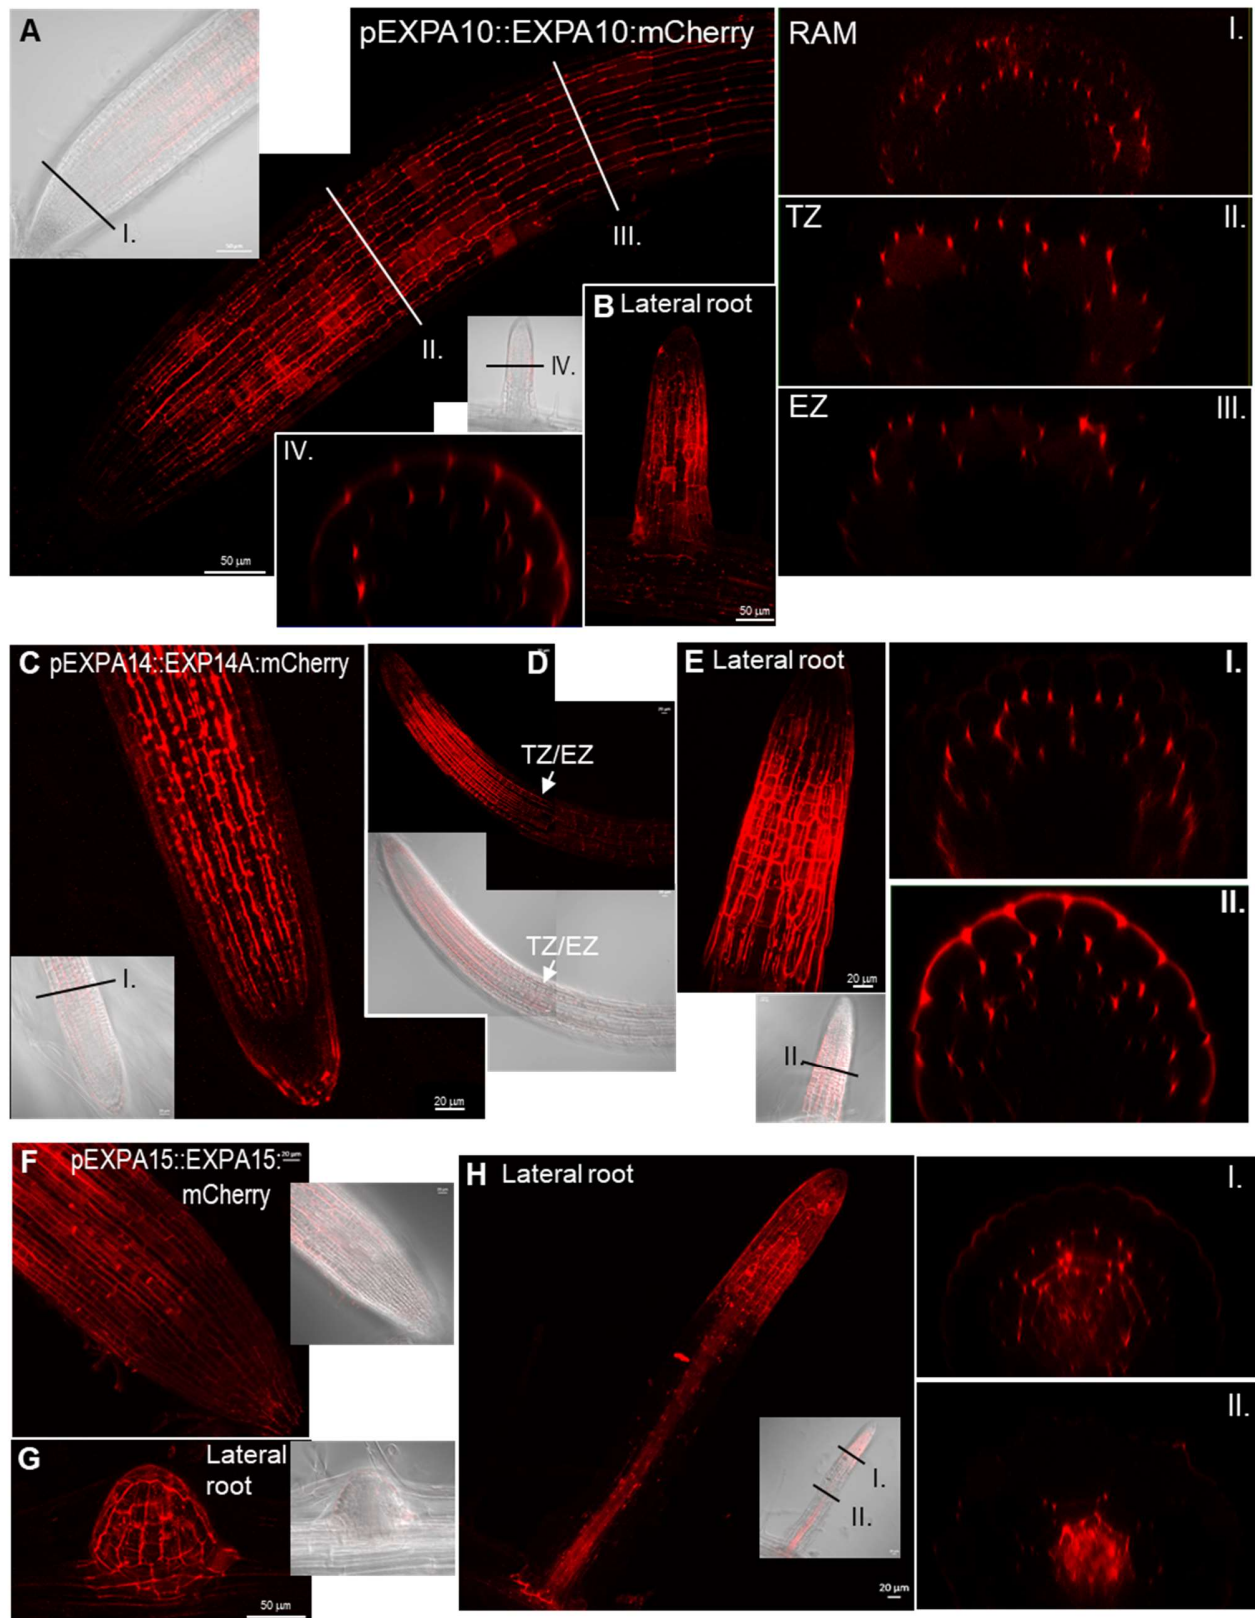

551



552 **Figure 3: Confocal imaging of fluorescently labelled expansins in *Arabidopsis* roots.**

553 Z-stack projections of EXPA:mCherry fusion localisation of (A) pEXPA10::EXPA10:mCherry in a  
554 primary root and (B) in a lateral root and transversal xz optical sections (I.-IV.) through the RAM,  
555 transition (TZ) and elongation (EZ) zones and the lateral root as indicated by the black and white  
556 lines; (C) pEXPA14::EXPA14:mCherry in RAM, (D) a primary root, (E) a lateral root and  
557 transversal xz optical sections (I. and II.) as indicated by the black lines, the white arrows point to  
558 the TZ/EZ boundary; (F) pEXPA15::EXPA15:mCherry in RAM, (G) an emerging lateral root, (H)  
559 a lateral root and its transversal xz optical sections (I. and II.) as indicated by the black lines.  
560 Transmitted-light micrograph inserts show a single optical section. Scale bars are 20  $\mu\text{m}$  except  
561 in A, B, G are 50  $\mu\text{m}$ .

**FIGURE 4**

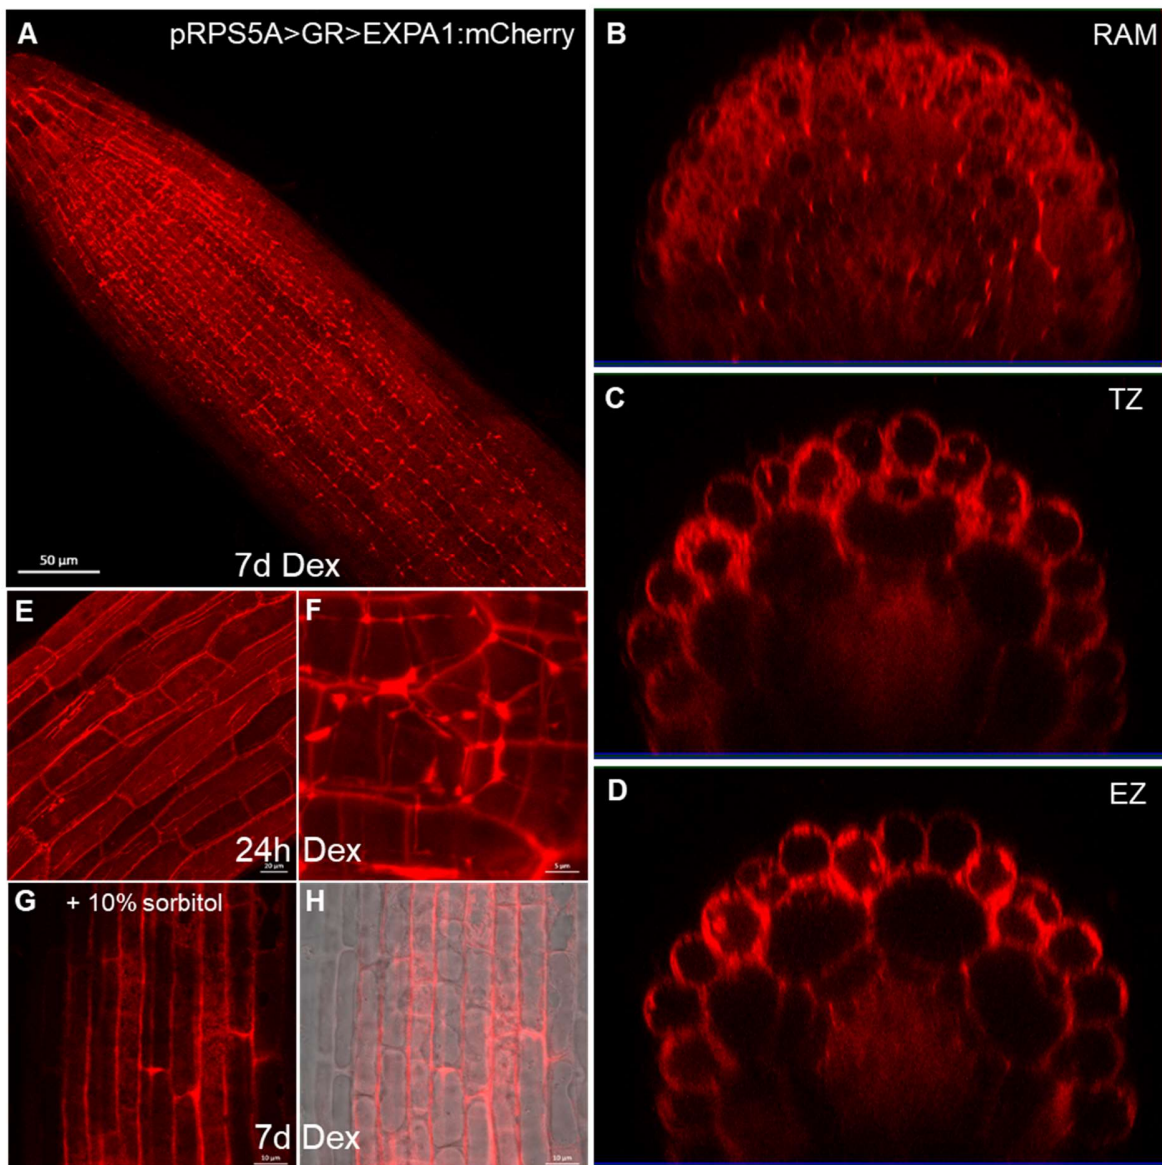

562

563 **Figure 4: Confocal imaging of a pRPS5A>GR>EXPA1:mCherry line induced by Dex.**

564 Z-stack projections of EXPA1:mCherry fluorescence induced by Dex on a solid MS medium for 7d  
565 in a primary root (**A, G**) and its xz optical cross-sections through (**B**) RAM, (**C**) TZ and (**D**) EZ; and  
566 in a liquid MS medium for 24h in (**E**) EZ of a primary root, (**F**) a lateral root and (**G,H**) after 10 min-  
567 treatment of the primary root with 10% sorbitol. Scale bar is 50  $\mu\text{m}$  in A, 20  $\mu\text{m}$  in E, 10  $\mu\text{m}$  in G  
568 and H and 5  $\mu\text{m}$  in F.

**FIGURE 5**

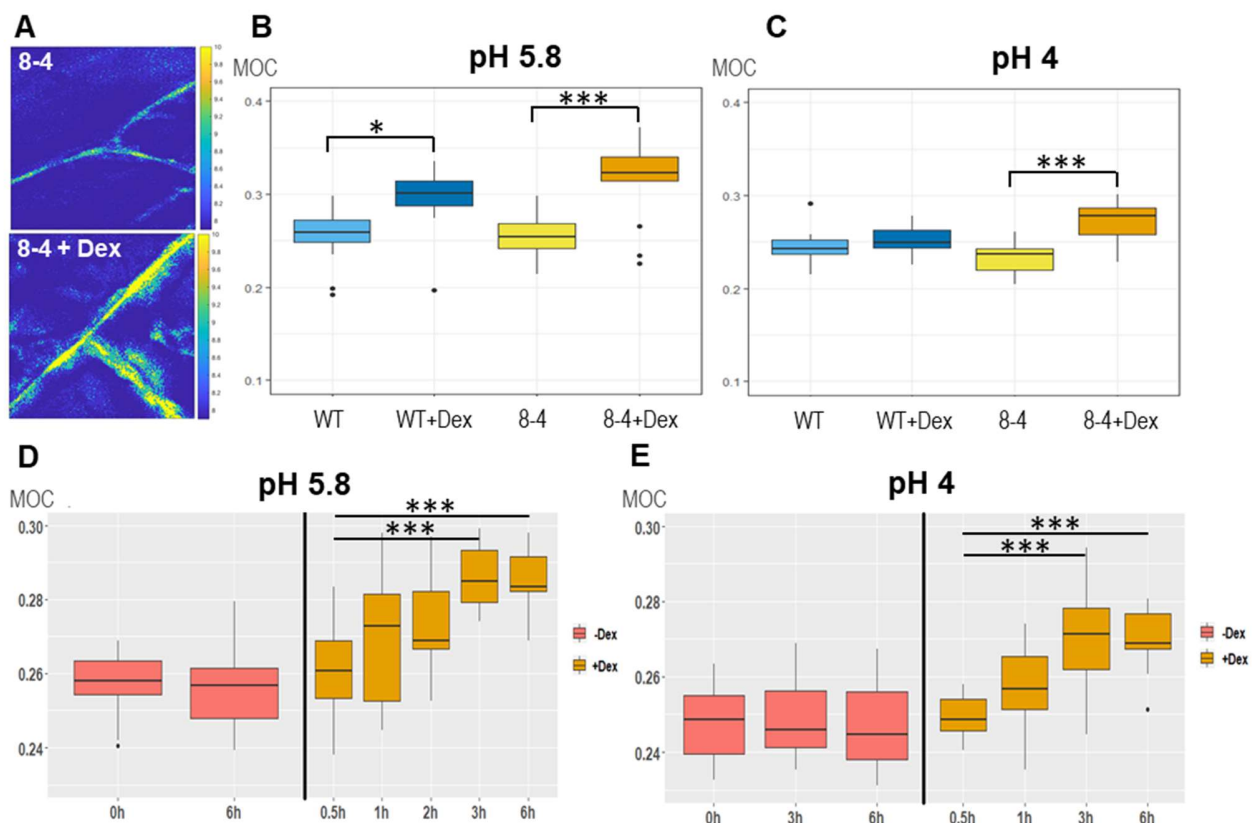

569 **Figure 5: Determination of cell wall biomechanical properties using Brillouin light**  
570 **scattering microscopy.**  
571

572 **(A)** 2D (*xy*) Brillouin frequency shift (BFS) maps show representative images of root cells of 7-day  
573 old *Arabidopsis EXPA1* overexpressing seedlings pRPS5A>GR>EXPA1 (line 8-4) grown on MS  
574 media pH 5.8 +/- Dex. BFS expressed as Mechano-Optical Contrast (MOC) was determined in  
575 roots of WT and the 8-4 line grown on MS media **(B)** +/- Dex pH 5.8, **(C)** +/- Dex pH 4, **(D)** induced  
576 in liquid MS media pH 5.8 for 0.5h – 6h, **(E)** induced in liquid MS media pH 4 for 0.5h – 6h; DMSO  
577 was used in -Dex treatments. Medians shown are from at least 4 seedlings and 10 measurements  
578 in each category. Stars indicate statistically significant differences within genotypes and  
579 treatments.

580

## FIGURE 6

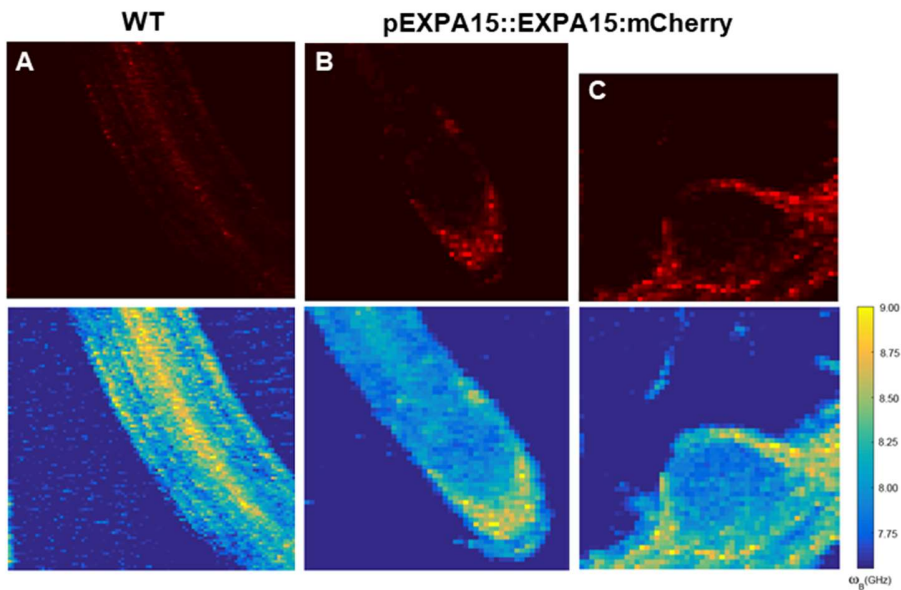

581

582 **Figure 6: Fluorescence emission-Brillouin scattering imaging of *Arabidopsis* roots.**

583 Fluorescence images (top row, in red) and Brillouin frequency shifts (BFS, bottom row) of 7-day  
584 old *Arabidopsis* root of (A) WT and pEXPA15::EXPA15:mCherry (B) a primary root and (C)  
585 an emerging lateral root. The fluorescent signal marks the expansin expression and overlaps with  
586 higher BFS.

## FIGURE 7

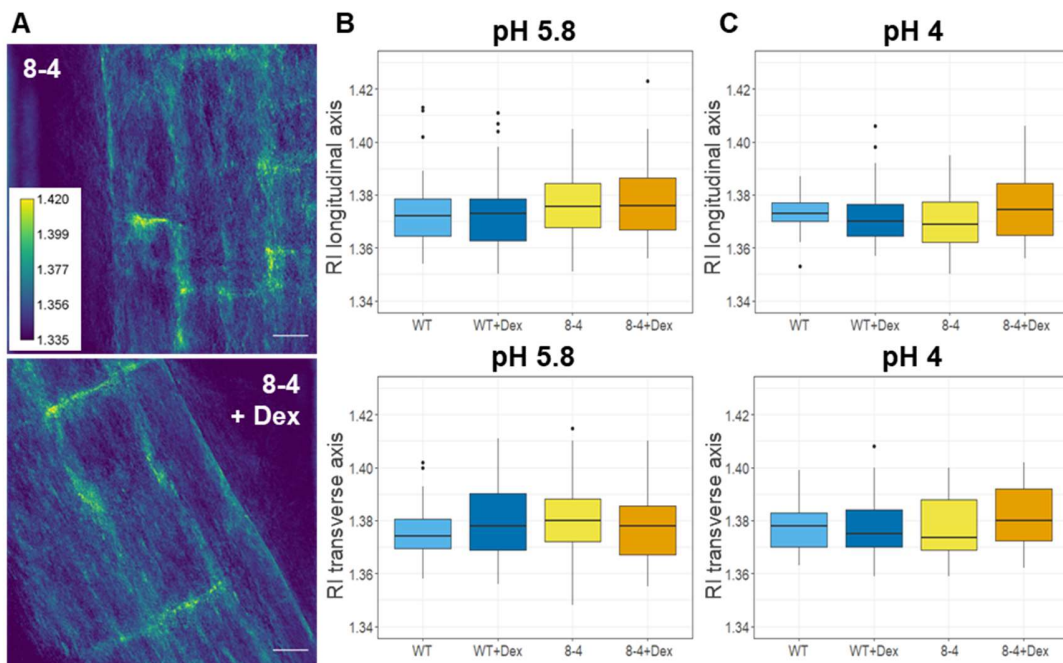

587

588 **Figure 7: Refractive index measurements of *Arabidopsis* root cell walls.**

589 **(A)** Refractive index tomograms (maximal projections) of root cells of 7-day old *Arabidopsis* of  
590 *EXPA1* overexpressing seedlings pRPS5A>GR>*EXPA1* (line 8-4) grown on MS media pH 5.8 +/-  
591 Dex. Scale bar indicates 20  $\mu$ m. The graphs show RI measurements in water (RI 1.330) of roots  
592 of WT and the 8-4 line grown on MS media **(B)** +/- Dex pH 5.8, **(C)** +/- Dex pH 4. Medians from  
593 minimum of 6 seedlings and 30 measurements in each category of longitudinal (upper) and  
594 transverse (lower) CW axis are shown. There are no statistically significant differences.

**FIGURE 8**

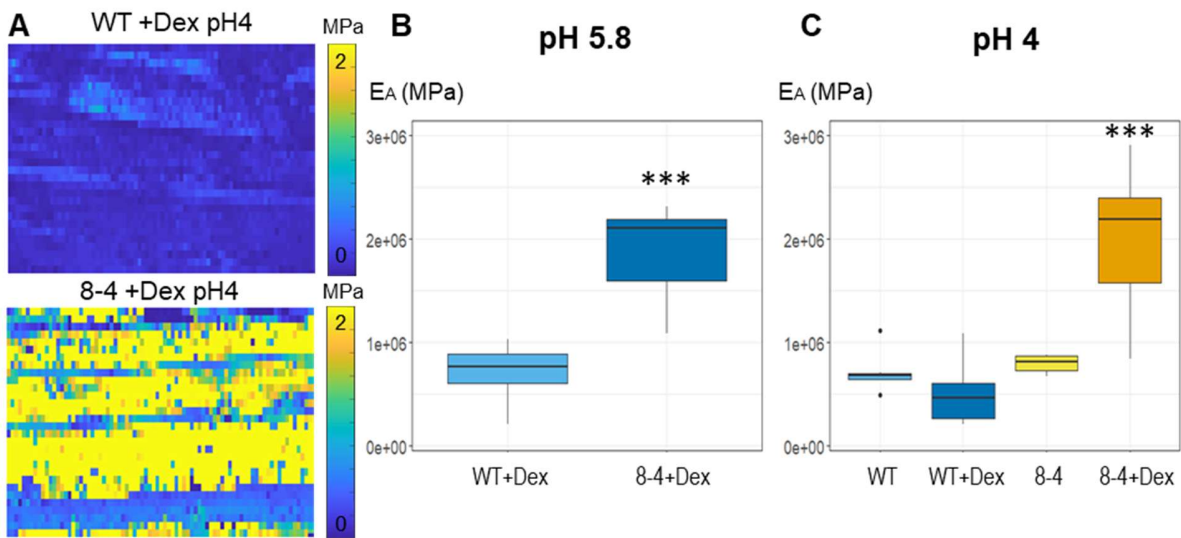

595  
596 **Figure 8: Determination of cell wall biomechanical properties using atomic force**  
597 **microscopy.**

598 **(A)** Representative maps of the apparent Young's modulus ( $E_A$ ) of root cells of 7-day old  
599 *Arabidopsis* WT and *EXPA1* overexpressing seedlings (line 8-4) grown on MS media pH 4 plus  
600 Dex, showing differences in  $E_A$  (representative of >50). The  $E_A$  maps are presented as heat maps,  
601 with their respective scales, and show data from two successive maps of  $60 \times 80$  and  $60 \times 80$   
602 force scans. Each pixel in the  $E_A$  map represents the  $E_A$  calculated from a single force-indentation  
603 curve, and each map consists of 4,800 data points. Images are 100  $\mu$ m in length. Graphs are  
604 presenting the  $E_A$  of the roots as in (A) grown on MS media +/- Dex **(B)** pH 5.8 and **(C)** pH 4. The  
605  $E_A$  plotted on the graphs was determined by sampling data points within the area of interest.  
606 Medians shown are from minimum of 6 measurements in each category. Stars indicate statistically  
607 significant differences.  
608

**FIGURE 9**

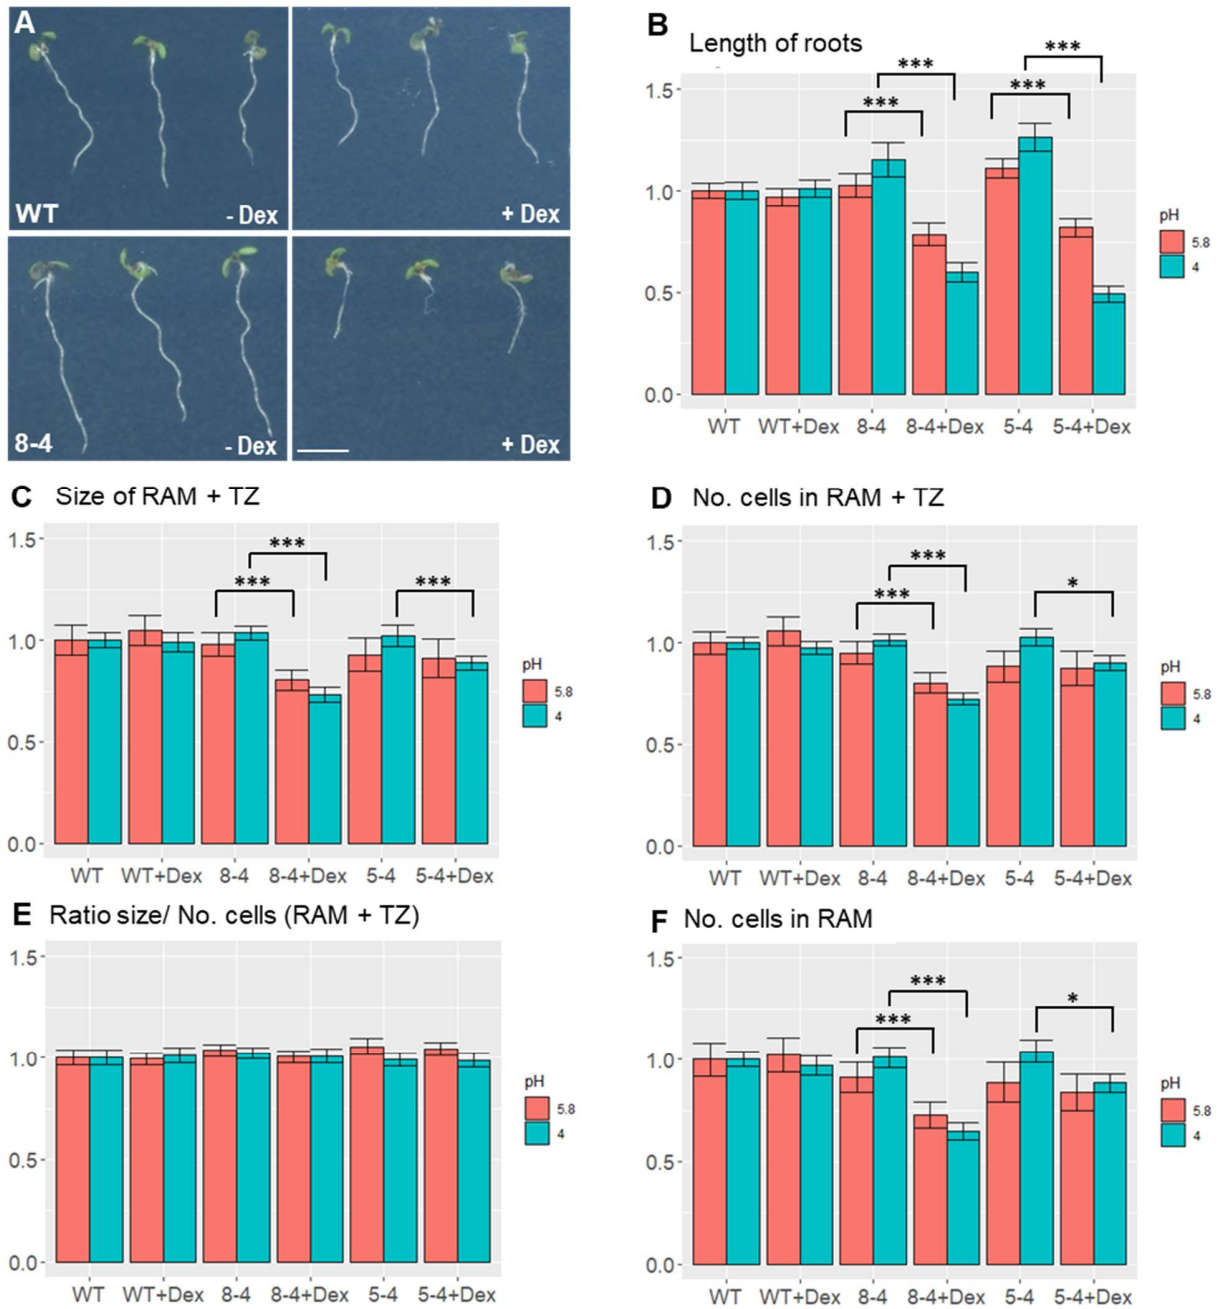

609

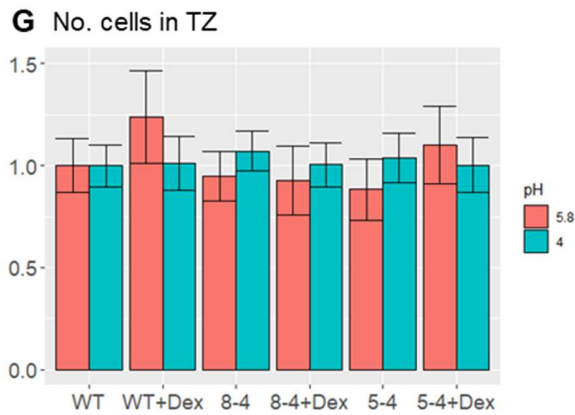

610

611 **Figure 9: The phenotype and root measurements of *EXPA1* overexpressing plants.**

612 **(A)** 7-day old *Arabidopsis* seedlings of WT (top row) and pRPS5A>GR>EXPA1 line 8-4 (bottom  
613 row) grown on MS media pH4 supplemented either with DMSO (-Dex) or dexamethasone (+Dex).  
614 The scale bar is 5 mm. **(B)** Length of roots, **(C)** size of RAM + TZ, **(D)** the total number of cells  
615 (No. cells) in RAM + TZ, **(E)** the ratio of size/ No. of cells **(F)** No. cells in RAM, **(G)** No. cells in TZ  
616 of two independent *EXPA1* overexpressing lines 8-4 and 5-4 grown on MS media +/- Dex pH 5.8  
617 and pH 4 relative to WT. Each experiment was repeated at least three times with minimum of 10  
618 seedlings in each category, error bars represent 95% confidence interval. Stars indicate  
619 statistically significant differences within genotypes and treatments.

## FIGURE 1 - FIGURE SUPPLEMENT 1

### A pEXPA1::nls:3xGFP

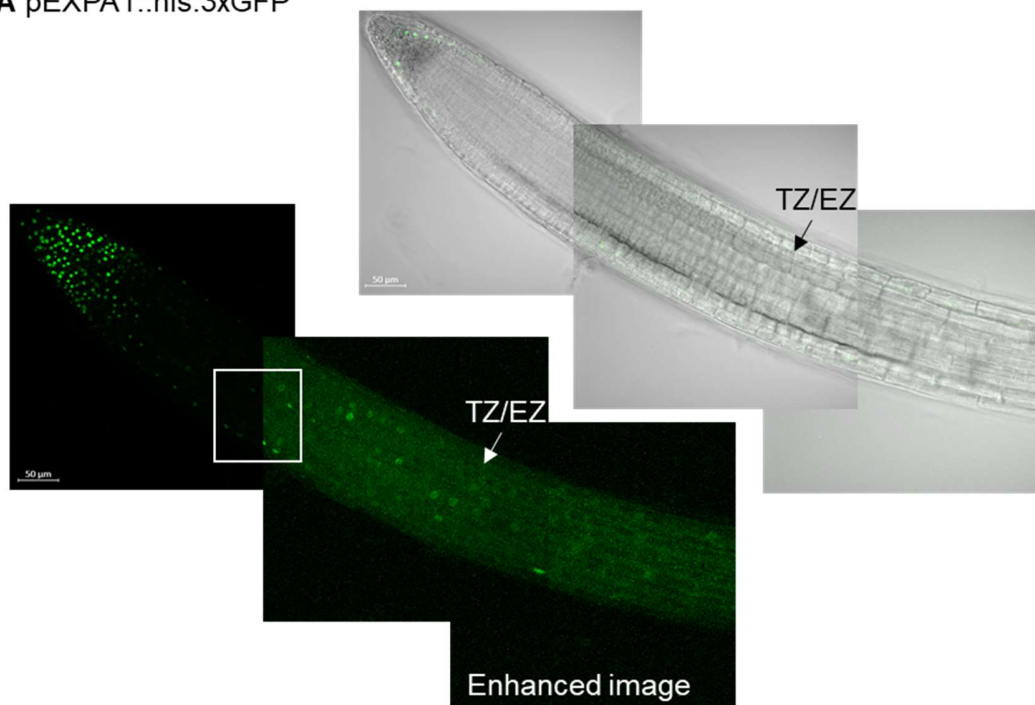

### B pEXPA1::EXPA1:mCherry

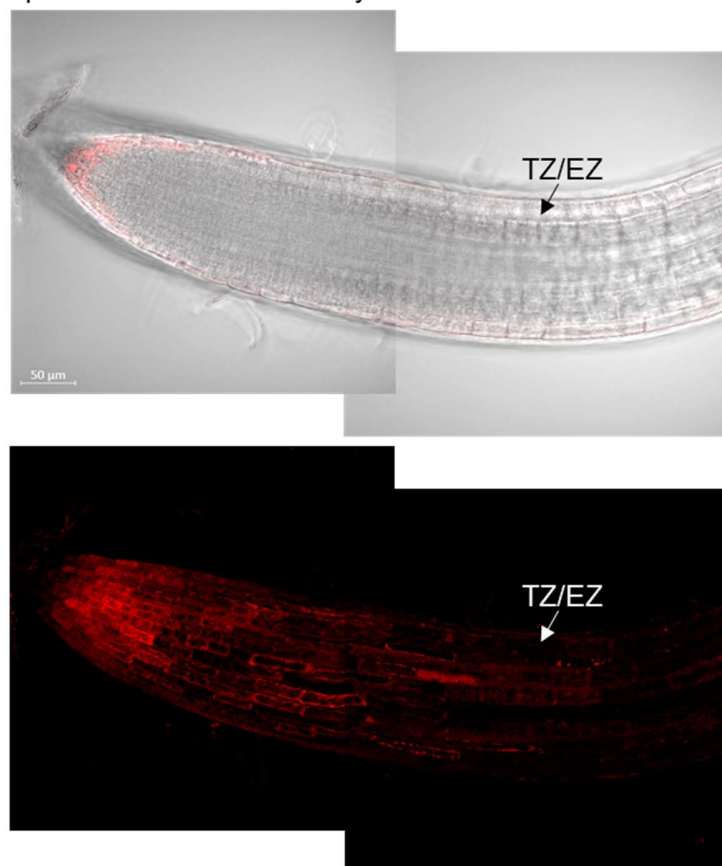

621 **Figure 1 – Figure Supplement 1: Confocal imaging of transcriptional and translational**  
622 **EXPA1 fusions.**

623 Z-stack projections and transmitted-light micrographs shown as a single optical section of 7-day  
624 old *Arabidopsis* seedlings of (A) pEXPA1::nls:3xGFP and (B) pEXPA1::EXPA1:mCherry lines.  
625 The TZ/EZ boundary is shown. The white square marks the same root area visualised without and  
626 with image enhancement done using the CLSM Zen 3.0 software.

**FIGURE 2 - FIGURE SUPPLEMENT 1**

TF of cytokinin signalling

*pEXPA10*

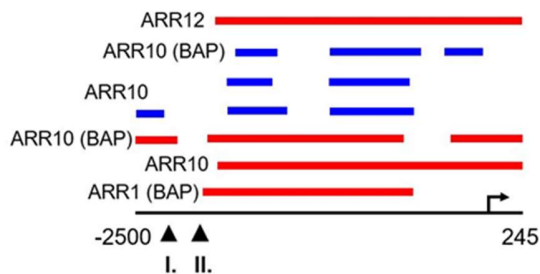

*pEXPA14*

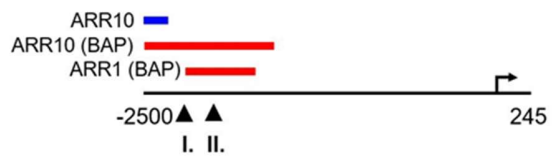

*pEXPA15*

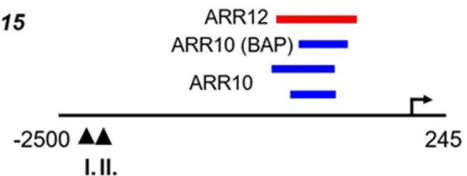

627  
628 **Figure 2 – Figure Supplement 1: Transcription factor binding events identified in EXPA**  
629 **promoters.**

630 Promoter analysis of *EXPA10*, *EXPA14* and *EXPA15* identifies ChIP-seq derived binding events  
631 for transcription factors involved in the cytokinin signalling pathway. Red, blue and green colours  
632 depict the peaks from Xie *et al.*, 2018, Zubo *et al.*, 2017 and O'Malley *et al.*, 2016, respectively.  
633 The coordinates are represented relative to the transcription start site marked by the arrow. The  
634 arrowheads indicate the beginning of each promoter in (I.) this publication and (II). Pacifici *et al.*,  
635 2018.



### FIGURE 3 - FIGURE SUPPLEMENT 1

pEXPA10::EXPA10:mCherry (fixed cells) + calcofluor white (CFW)

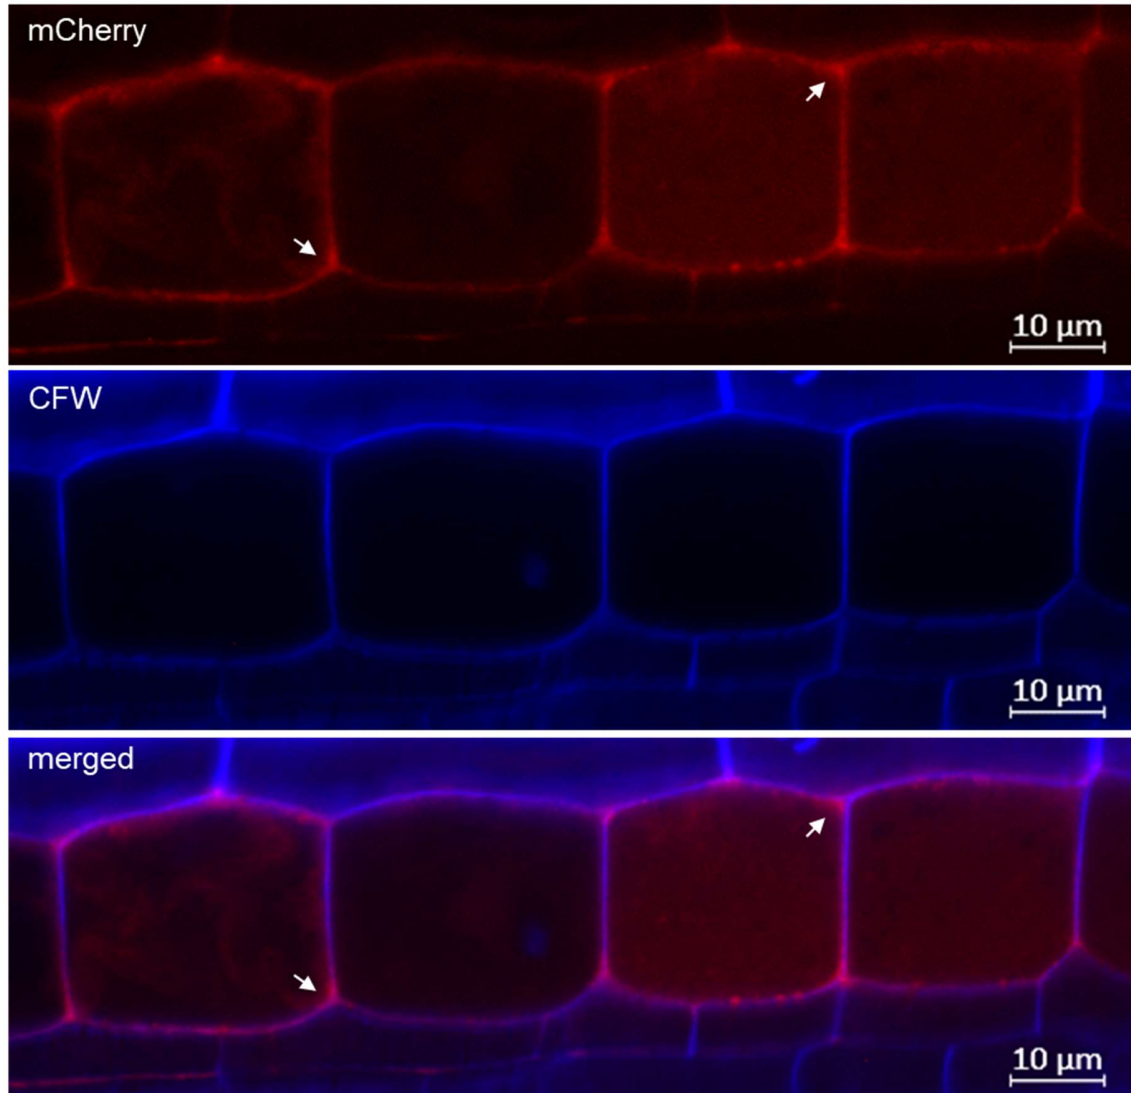

636

637 **Figure 3 – Figure Supplement 1: Confocal imaging of pEXPA10::EXPA10:mCherry and cell**  
638 **wall labelling.**

639 Z-stack projections of a pEXPA10::EXPA10:mCherry line (red) fixed, cleared and stained with  
640 calcofluor white (CFW, blue) according to a protocol in Ursache *et al.*, 2018. The arrowheads point  
641 to examples of places where the EXPA10:mCherry does not co-localise with cellulose deposition  
642 labelled by CFW. The scale bar is 10 μm.

## FIGURE 3 - FIGURE SUPPLEMENT 2

**A** pEXPA14::EXPA14:mCherry x  
pSCR >GR>mTurquoise2 (endodermis)

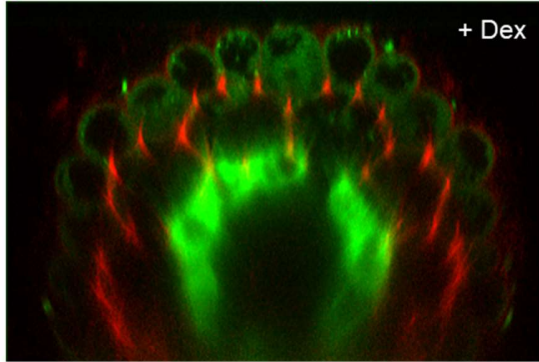

**B** pEXPA15::EXPA15:mCherry x  
pSMXL5 >GR>mTurquoise2 (phloem)

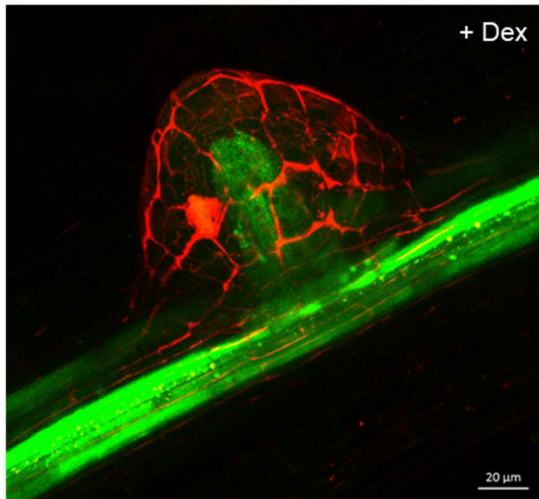

643

644 **Figure 3 – Figure Supplement 2: Confocal imaging of EXPA14:mCherry and**  
645 **EXPA15:mCherry fusion lines crossed with tissue specific marker lines.**

646 **(A)** A transversal (xz) optical section of a primary root of F1 pEXPA14::EXPA14:mCherry line  
647 crossed with pSCR>GR>mTurquoise2 showing CW of cortex (red) and endodermis (green, also  
648 background autofluorescence in epidermis); **(B)** a z-stack projection of an emerging lateral root of  
649 F1 pEXPA15::EXPA15:mCherry line crossed with pSMXL5 >GR>mTurquoise2 showing CW of  
650 epidermis (red) and phloem (green). The 7-day old *Arabidopsis* seedlings were grown on MS  
651 media +Dex to induce the mTurquoise2 ER-specific expression.

### FIGURE 3 - FIGURE SUPPLEMENT 3

pEXPA10::EXPA10:mCherry

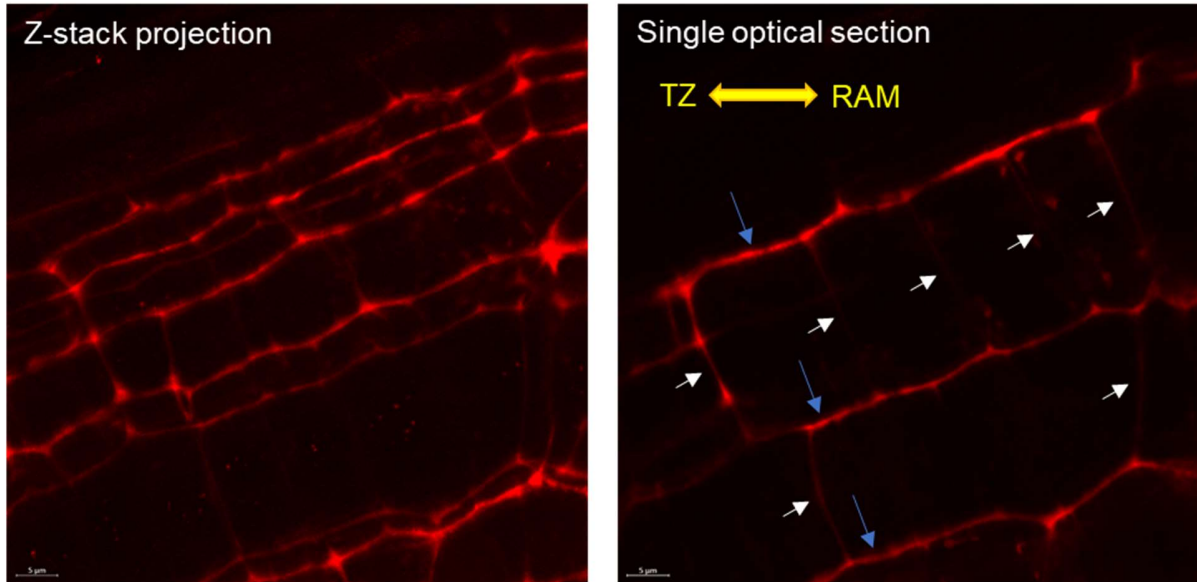

652  
653 **Figure 3 – Figure Supplement 3: Confocal imaging of pEXPA10::EXPA10:mCherry using**  
654 **the CLSM Airyscan detector.**

655 A z-stack projection (left) and a single optical section (right) of a 7-day old *Arabidopsis* root of  
656 pEXPA10::EXPA10:mCherry line imagined using the Airyscan detector of Zeiss 880 CLSM. Blue  
657 arrows point to longitudinal and white arrows to less visible transversal CWs of individual cells;  
658 the root orientation is indicated by the yellow double arrows pointing towards to RAM and TZ.

### FIGURE 4 - FIGURE SUPPLEMENT 1

UBQ10::YFP-PIP1;4 marker line (plasma membrane) + 10% sorbitol

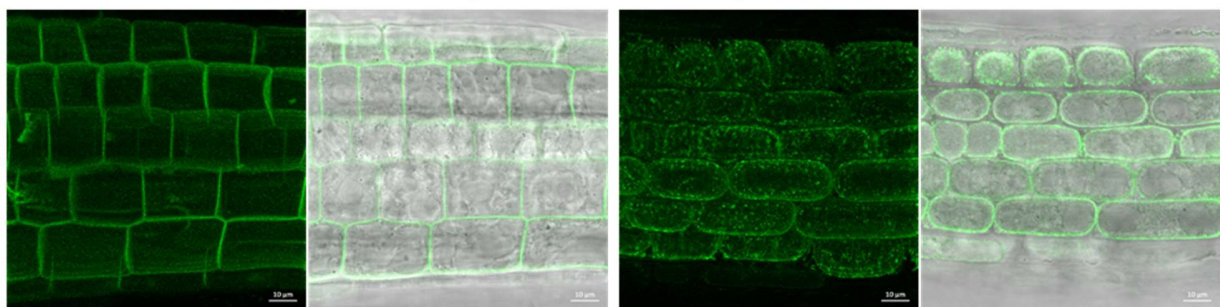

659  
660 **Figure 4 – Figure Supplement 1: Confocal imaging of a plasma membrane marker line**  
661 **UBQ10::YFP-PIP1;4 before and after plasmolysis.**

662 Z-stack projections and transmitted-light micrographs shown as a single optical section of 7-day  
663 old *Arabidopsis* seedlings of a UBQ10::YFP-PIP1;4 line (von Wangenheim *et al.*, 2016) labelling

664 plasma membrane imaged before and after treatment with 10% sorbitol for 10 min. The scale bar  
665 is 10  $\mu$ m.

## FIGURE 5 - FIGURE SUPPLEMENT 1

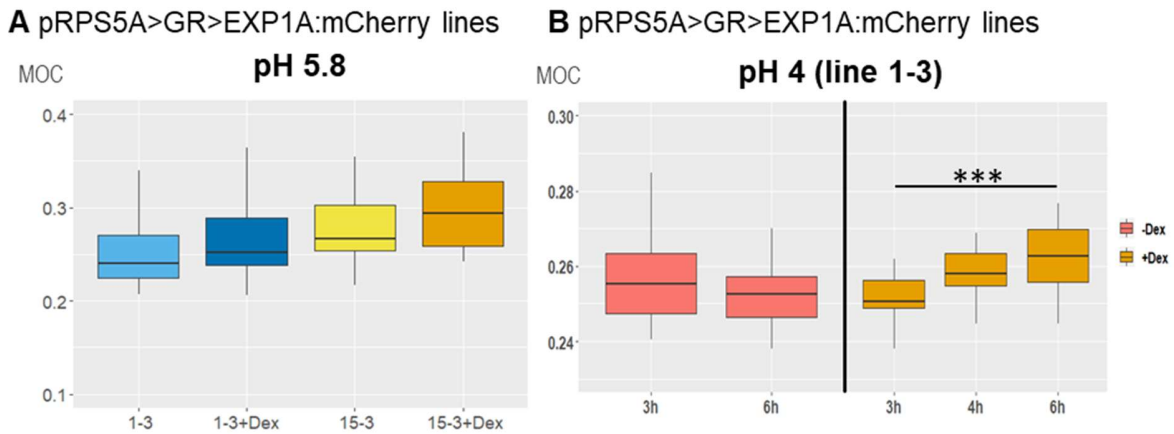

666  
667 **Figure 5 – Figure Supplement 1: Determination of cell wall biomechanical properties using**  
668 **Brillouin light scattering microscopy.**

669 Mechano-Optical Contrast (MOC) was determined in roots of 7-day old *Arabidopsis*  
670 *EXPA1:mCherry* overexpressing seedlings pRPS5A>GR>EXP1A:mCherry (lines 1-3 and 15-3)  
671 grown on MS media **(A)** +/- Dex pH 5.8 or **(B)** induced in liquid MS media pH 4 for 3h – 6h; DMSO  
672 was used in -Dex treatments. Medians shown are from at least 4 seedlings and 10 measurements  
673 in each category. Stars indicate statistically significant differences within genotypes and  
674 treatments.

## FIGURE 5 - FIGURE SUPPLEMENT 2

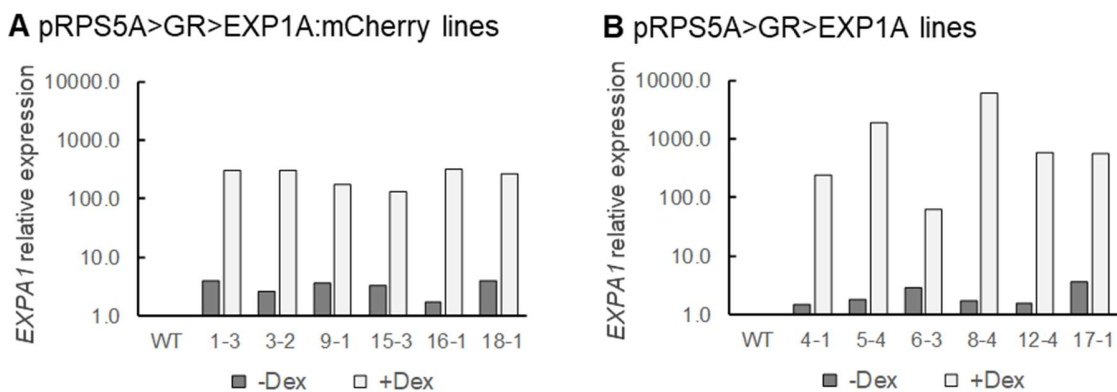

675  
676 **Figure 5 – Figure Supplement 2: Quantitative real-time PCR of Dex-induced levels of**  
677 **expression of *EXP1A:mCherry* and *EXP1A* in selected lines.**

678 Relative *EXP1A* expression levels in independent T3 homozygous lines of **(A)**  
679 pRPS5A>GR>EXP1A:mCherry (1-3, 3-2, 9-1, 15-3, 16-1 and 18-1) and **(B)** pRPS5A>GR>EXP1A

680 (4-1, 5-4, 6-3, 8-4, 12-4 and 17-1) seedlings grown on MS media +/- Dex for 7 days. The transcript  
 681 abundance of *EXPA1* is normalized to WT and relative to constitutively expressed *UBQ10*. The  
 682 experiment was done once with 3 technical replicas. Note the logarithmic scale of the *EXPA1*  
 683 relative expression.

684

## FIGURE 9 - FIGURE SUPPLEMENT 1

**A** *exp1* lines

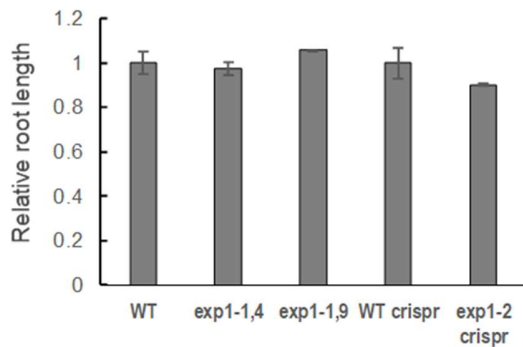

**B** *exp1* lines

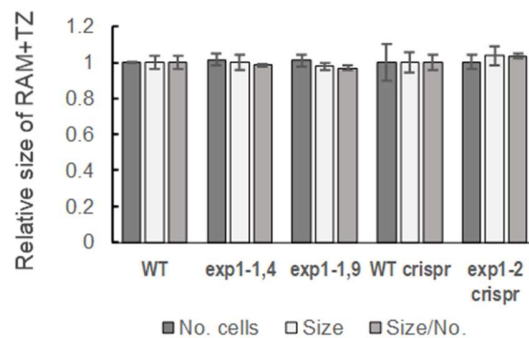

**C** amiEX1 lines

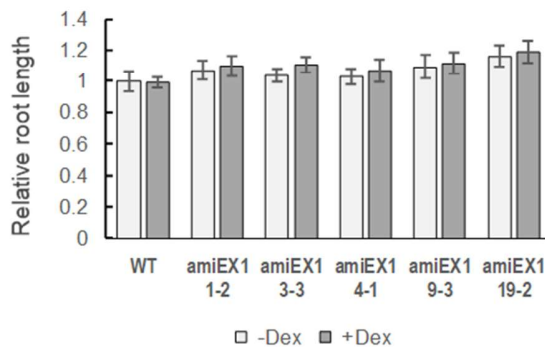

**D** amiEX1 lines

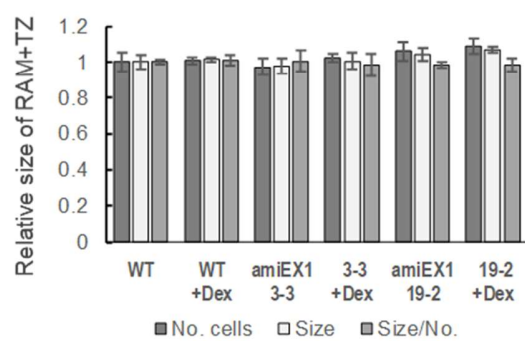

685

686 **Figure 9 – Figure Supplement 1: Root measurements of *expa1* knock-out and knock-down**  
 687 **lines.**

688 **(A)** Root length and **(B)** a number of cells in RAM + TZ, size of RAM + TZ size and the ratio size/  
 689 number of cells was measured in 7-day old *Arabidopsis* WT, two families of homozygous knock-  
 690 out lines *exp1-1,4* and *exp1-1,9* (Pacifi et al., 2018), CRISPR/Cas9 *exp1-2* (Ramakrishna et al.,  
 691 2019) and its segregated WT (crispr). **(C)** Root length and **(D)** a number of cells in RAM + TZ, size  
 692 of RAM + TZ and the ratio size/ number of cells was measured in WT and selected independent  
 693 T3 homozygous p35S>GR>amiRNA *EXPA1*, 14, 15 (amiEX1) lines (1-2, 3-3, 4-1, 9-3, 19-3)  
 694 grown on MS media +/- Dex for 7 days. The data are normalised to the corresponding WT, or WT  
 695 with mock DMSO treatment (-Dex). The experiment was repeated twice with minimum of 10  
 696 seedlings in each category, error bars represent SEM. There are no statistically significant  
 697 differences.

698

## 699 MATERIAL AND METHODS

### 700 Promoter analysis

701 2500 bp regions upstream of the transcription start site and entire 5'UTRs were used for prediction  
702 of TF binding regions in gene promoters. The TAIR10 version of the *A. thaliana* genome  
703 ([https://www.arabidopsis.org/download\\_files/Genes/TAIR10\\_genome\\_release/TAIR10\\_](https://www.arabidopsis.org/download_files/Genes/TAIR10_genome_release/TAIR10_chromosome_files/TAIR10_chr_all.fas)  
704 [chromosome\\_files/TAIR10\\_chr\\_all.fas](https://www.arabidopsis.org/download_files/Genes/TAIR10_genome_release/TAIR10_chr_all.fas)) was used for the analyses. *A. thaliana* genome annotation  
705 data were retrieved from Araport11 ([https://www.arabidopsis.org/download\\_](https://www.arabidopsis.org/download_files/Genes/Araport11_genome_release/Araport11_GFF3_genes_transposons.201606.gff.gz)  
706 [files/Genes/Araport11\\_genome\\_release/Araport11\\_GFF3\\_genes\\_transposons.201606.gff.gz](https://www.arabidopsis.org/download_files/Genes/Araport11_genome_release/Araport11_GFF3_genes_transposons.201606.gff.gz)).  
707 To identify potential B-ARR binding regions, two sets of publicly available ChIP-seq data we used.  
708 First on ARR1,10,12 binding in 3-day old seedlings of Ypet-tagged B-ARRs lines treated with 10  
709  $\mu$ M BAP or mock treated for 4h (Xie *et al.*, 2018). Second on ARR10 binding in two to 3-week old  
710 seedlings of 35S::ARR10:GFP lines treated with 5  $\mu$ M BAP or mock treated for 30 minutes (Zubo  
711 *et al.*, 2017). To identify potential ARF binding regions we used DAP-seq data for ARF2 and ARF5  
712 (O'Malley *et al.*, 2016). The corresponding processed data were retrieved from Gene Expression  
713 Omnibus database (<https://www.ncbi.nlm.nih.gov/geo/>), the Quickload server for the Integrated  
714 Genome Browser (IGB) ([bioviz.org](http://bioviz.org), Freese *et al.*, 2016) and Plant Cistrome Database  
715 (<http://neomorph.salk.edu/PlantCistromeDB>), respectively.

### 716 Quantitative real-time transcript profiling (RT qPCR)

717 Total RNA was extracted from 7-day old wild-type *Arabidopsis thaliana* (ecotype Columbia-0)  
718 seedlings treated with either 5  $\mu$ M BAP or 5  $\mu$ M NAA for 0.5h, 1h, 2h, 4h and non-treated seedlings  
719 as controls. First-strand cDNA was synthesized from total RNA using SuperScript III Reverse  
720 Transcriptase (Thermo Fisher Scientific). RT qPCR was performed on cDNAs, with primers  
721 spanning an intron summarized in Table 1: for *EXPA1* (*At1g69530*, P1 and P2), *EXPA10*  
722 (*At1g26770*, P3 and P4), *EXPA14* (*At5g56320*, P5 and P6) and *EXPA15* (*At2g03090*, P7 and P8).  
723 The transcript abundance of *EXPAs*, relative to constitutively expressed normalizer gene, *UBQ10*  
724 (*At4g05320*, P9 and P10), was quantified, using the  $2^{-\Delta\Delta C(T)}$  method (Livak and  
725 Schmittgen, 2001) and calibrated to expression at 0h (non-treated). Real-time quantification was  
726 performed in Rotor-Gene Q 72-slots using the Rotor-Gene Q Series Software (QIAGEN). PCR  
727 conditions were: 95°C for 7 min, one cycle; 15 s at 95°C, 30 s at 56°C, 30 s at 72°C, 40 cycles.  
728 Reactions with no cDNA monitored for the presence of primer dimers and no reverse transcriptase  
729 controls were included for each cDNA sample. PCRs were carried out in triplicate and mean  
730 values determined.

### 731 Table 1: List of primers used for RT qPCR

| Name        | No. | Sequence (5' – 3')           |
|-------------|-----|------------------------------|
| pEXPA1-Fi2  | P1  | CTTACCGAAGAGTGCCGTGCGTG      |
| pEXPA1-R2   | P2  | ATTGTCCGTTAAGGTAAGAGTTACTCTG |
| pEXPA10-Fi2 | P3  | CTACAGAAGGGTTCCTTGCCAGG      |
| pEXPA10-R2  | P4  | TTGCCACACTGTTCTTGAACCCTTG    |
| pEXPA14-Fi2 | P5  | AATACCGGAGAGTGGCTTGCCG       |
| pEXPA14-R2  | P6  | CGAAGCTCCAGTTACGTGGTGTAGC    |

|             |     |                          |
|-------------|-----|--------------------------|
| pEXPA15-Fi2 | P7  | CCTACAGAAGGGTTCGGTGTATG  |
| pEXPA15-R2  | P8  | ACGGTACGACCATCACTAGCAGTC |
| UBQ10-F     | P9  | AACGGGAAAGACGATTAC       |
| UBQ10-R     | P10 | ACAAGATGAAGGGTGGAC       |

732

### 733 Cloning and plant transformation

734 Standard molecular techniques as described by Ausubel *et al.*, (1999) were used. To clone the  
 735 translational fusions of expansins with mCherry, firstly, an intermediate clone (pZEO-  
 736 mCherryT35S) that contains unique restriction sites *PacI* and *SnaBI* as well as a flexible linker in  
 737 front of mCherry sequence, was created as follows. Two DNA fragments were generated by  
 738 polymerase chain reaction (PCR) using Herculase II Fusion DNA polymerase (Agilent  
 739 Technologies), primers P11 + P12 and P13 + P14 and plasmids pUCAP-pGEL3::spmCherry-  
 740 pATrpC-BAR (Samalova *et al.*, 2017) and pOpIn2 (Samalova *et al.*, 2019) as templates for  
 741 mCherry and a polyadenylation signal (T35S) respectively. The fragments were joined together  
 742 by overlapping PCR using P11 and P14. The final product was cloned by BP reaction into attB1  
 743 and attB2 sites of GATEWAY™ compatible plasmid pDONOR/Zeo and confirmed by sequencing.  
 744 Secondly, individual promoter sequences together with *EXPA* coding sequences (but without a  
 745 stop codon) were amplified from genomic DNA using primers P15 + P16 (pEXPA1::EXPA1), P17  
 746 + P18 (pEXPA10::EXPA10), P19 + P20 (pEXPA14::EXPA14) and P21 + P22  
 747 (pEXPA15::EXPA15). The products were digested with either *SnaBI* (pEXPA1::EXPA1 and  
 748 pEXPA15::EXPA15), *PacI* (pEXPA10::EXPA10) or both *PacI/SnaBI* (pEXPA14::EXPA14) and  
 749 cloned into the same sites of pZEO-mCherryT35S and confirmed by sequencing. Finally, the  
 750 pEXPA::EXPA:mCherryT35S fusions were re-cloned by LR reaction into attR1 and attR2 sites of  
 751 pFAST-G01 vector (Shimada *et al.*, 2010).

752 To overexpress *EXPA1* and *EXPA1:mCherry* fusion, the dexamethasone (Dex) inducible  
 753 pOp6/LhGR system (Craft *et al.*, 2005; Samalova *et al.*, 2005) was used. Firstly, we PCR-amplified  
 754 *EXPA1* using P23 + P24 and *EXPA1:mCherry* using P23 + P25 sequences from the pZEO-  
 755 pEXPA1::EXPA1:mCherryT35S vector generated above, cloned into the pDONOR/Zeo vector  
 756 and confirmed by sequencing. Secondly, using GATAWAY™ cloning strategy described above  
 757 we re-cloned the *EXA1* and *EXPA1;mCherry* sequences into a pOpIn2-RPS5A plasmid  
 758 (Samalova *et al.*, 2019) that drives the LhGR activator under the constitute *AtRPS5A* promoter  
 759 (Weijers *et al.*, 2001).

760 *Arabidopsis thaliana* (ecotype Columbia-0) was transformed using the floral dip method (Clough  
 761 and Bent, 1998) and the transgenic plants were selected on Murashige and Skoog (MS) medium  
 762 (Murashige and Skoog, 1962) containing 15 µg/ml hygromycin for the pFAST-G01 vectors and 10  
 763 µg/ml phosphinothricin for the pOpIn2 vectors.

764 **Table 2: List of primers used for expansin cloning – underlined unique restriction sites used**  
 765 for cloning, **bold** start and stop codons

| Name | No. | Sequence (5' – 3') |
|------|-----|--------------------|
|------|-----|--------------------|

|                 |     |                                                                                                   |
|-----------------|-----|---------------------------------------------------------------------------------------------------|
| attB1-SPS-mCh-F | P11 | GGGGACAAGTTTGTACAAAAAGCAGGCTTCCCTGCAGG<br>TTAATTAAAGGCTACGTAGGAGGCATGGTGAGCAAGGGCG<br>AGGAGGATAAC |
| mCh-T35S-R      | P12 | ATGGTGCGCCAGGAGAGTTGTTGATTACTTGTACAGCTCGT<br>CCATGCCGC                                            |
| mCh-T35S-F      | P13 | GGCATGGACGAGCTGTACAAGTAATCAACAACCTCTCCTGG<br>CGCACCATCG                                           |
| attB2-T35S-R    | P14 | GGGGACCACTTTGTACAAGAAAGCTGGGTCCCTGCAGGTC<br>ACTGGATTTTGGTTTTAGG                                   |
| KS-pEXP1-F      | P15 | AAAAGGTACCTACGTAGACAAATGACAATTACTCTTTACGAT<br>TGTCG                                               |
| S-EXP1nos-R     | P16 | AAAATACGTAAGC ACTCGAAGCACCCTTCTTTTTAGG                                                            |
| KP-pEXP10-F     | P17 | AAAAGGTACCTTAATTAAGTCATCAACAGGTGGATAGTCGC<br>ATGG                                                 |
| P-EXP10nos-R    | P18 | AAAATTAATTAACGGAAGTGTCCACCGGCAAAGTCTGGC<br>C                                                      |
| KP-pEXP14-F     | P19 | AAAAGGTACCTTAATTAATTCTTGAATTGATTAAGTAACGT<br>GCG                                                  |
| S-EXP14nos-R    | P20 | AAAATACGTACCTCTGAGCCCGGAAGTGTTCCTCGGTATAA<br>GTC                                                  |
| KS-pEXP15-F     | P21 | AAAAGGTACCTACGTAAAAACATAATGTCAGAAAAACATG<br>GG                                                    |
| S-EXP15nos-R    | P22 | AAAATACGTA ACG GAATTGACGGCCGGTGAAGGTTTGTCC                                                        |
| attB1-kExp1-F   | P23 | GGGGACAAGTTTGTACAAAAAGCAGGCTTCCACGATGGCT<br>CTTGTCACCTTCTTGTATTGC                                 |
| attB2-sExp1-R   | P24 | GGGGACCACTTTGTACAAGAAAGCTGGGTCTCAAGCACTC<br>GAAGCACCCTTCTTTTTAGG                                  |
| attB2-smCh-R    | P25 | GGGGACCACTTTGTACAAGAAAGCTGGGTCTTACTTGTACA<br>GCTCGTCCATGCCGC                                      |

766

#### 767 **Plant growth condition and dexamethasone (Dex) induction**

768 Standard MS medium supplemented with 1.5% sucrose and 0.8% plant agar (Duchefa), pH 5.8  
769 adjusted by KOH or pH 4 adjusted by H<sub>2</sub>SO<sub>4</sub> was used. Plants were cultivated in growth chambers  
770 under long day conditions (16 h light/ 8 h dark) at 21°C in Petri dishes or in soil, with a light intensity  
771 of 150 μM.m<sup>-2</sup>.s<sup>-1</sup> and 40% relative humidity. Unless otherwise stated induction was performed by  
772 adding 20 μM Dex into the media as described in Samalova *et al.* (2019). DMSO at the same  
773 concentration was used as a control.

#### 774 **Confocal laser scanning microscopy (CLSM) and image analysis**

775 To localise EXPA:mCherry fusions Zeiss LSM 880 laser-scanning microscope was used. mCherry  
776 fluorescence was detected at 580-650 nm with 561-nm HeNe laser excitation and eGFP at 490-  
777 550 nm with a 488-nm Argon laser line. Quantification of the fluorescence was done using



778 CellProfiler (mCherry) and Imaris (nls:3xGFP) softwares. To measure the size of RAM, 7-day old  
779 *Arabidopsis* seedlings were stained with propidium iodide at concentration 30  $\mu\text{g/ml}$  for 5 min,  
780 scanned at 590-650 nm with 488-nm excitation and measured using the ZEN 3.0 software. The  
781 roots were imaged using the C-Apochromat 40x/1.2 water corrected objective lens or Plan-  
782 Apochromat 25x/0.8 immersion corrected.

### 783 **Brillouin light scattering (BLS) microscopy**

784 Brillouin microscopy was performed using a homebuilt Brillouin confocal microscope described in  
785 Elsayad *et al.*, 2016. Excitation was via a single-mode 532nm laser (Torus, Laser Quantum,  
786 DE). A dual cross-dispersion Virtual Imaged Phase Array (VIPA) spectrometer (Scarcelli *et al.*,  
787 2015) with a Lyott Stop (Edrei *et al.*, 2017) was employed for measuring the Brillouin Light  
788 Scattering spectra. The spectral projection was measured on a cooled EM CCD camera  
789 (ImageEMX II, Hamamatsu, JP). The spectrometer was coupled to an inverted microscope frame  
790 (IX73, Olympus, JP) via a physical pinhole with an effective size of 1 Airy Unit to assure optimum  
791 confocal detection. After the pinhole a dichroic mirror was used to outcouple light with wavelengths  
792 longer than 536nm to a fluorescence spectrometer (Ocean Optics QE Pro, USA) to detect the  
793 fluorescence signal assuring pixel-to-pixel correlation with the measured Brillouin spectra. To  
794 acquire Brillouin maps, samples were scanned in x,y &/or z using either a 3-axis long-range Piezo-  
795 stage (Physik Instrumente, DE) or a motor stage (ASI, USA), both mounted on top of the inverted  
796 microscope frame. Light could also be coupled out through a second port on the microscope frame  
797 using a long-pass filter (AHF, DE) and tube lens to a compact sCMOS camera (Thorlabs, DE)  
798 allowing us to locate samples and regions of interest (in wide-field transmitted light conditions  
799 when illuminating sample from the top with a Halogen lamp) as well as monitor the position being  
800 probed during scanning.

801 All hardware was controlled using LabView (National Instruments, USA) based software  
802 developed by the company THATec (DE) especially for our microscope. The 16bit depth spectral  
803 projection image for each position in a spatial scan was exported from the native THATec format  
804 into Matlab (Mathworks, DE), where a custom written code was used for analysis. This code (see  
805 also Elsayad *et al.*, 2016) used two calibration spectra (of triple distilled water and spectroscopic  
806 grade ethyl alcohol) measured before and after each set of scans. These were used for registration  
807 of the spectral projection onto a frequency scale, based on the calculated dispersion for a dual-  
808 VIPA setup in the paraxial approximation regime (Xiao *et al.*, 2014). The alignment of the  
809 spectrometer was such that maximal energy was transferred into a single diffraction order. Due to  
810 the spatial masking of the elastic scattering peaks at the two intermediate imaging planes in the  
811 spectrometer, the spectral projection consisted of only two inelastic scattering peaks  
812 corresponding to the so-called Brillouin Stokes and anti-Stokes scattering peaks.

813 All data analysis was performed in Matlab (Mathworks, DE) using custom written scripts (Elsayad  
814 *et al.*, 2016). Spectral phasor analysis (Elsayad, 2019) was used to obtain initial parameter  
815 estimates for peak positions and widths which were subsequently inserted into a non-linear least  
816 squares fitting algorithm that fitted two broadened Lorentzian functions (Voigt functions) to obtain  
817 the two peak positions, from which the Brillouin frequency shift could be obtained. The BLS spectra  
818 was also deconvolved in phasor space using a response function obtained from measuring the  
819 attenuated Rayleigh scattering inside the respective samples (by opening the spatial masks).

820 For all scans the laser power at the sample was between 1-5 mW, and the dwell time per point,  
821 which was also the acquisition time of each spectra, was 100ms. Cells were observed (by  
822 transmitted-light widefield illumination) to appear healthy and unperturbed after experiments,  
823 suggesting the BLS measurements had no negative or phototoxic effects. A 1.4 NA objective was  
824 used for excitation and detection (back-scattering geometry). As such a broad range of scattering  
825 wavevectors is probed and one effectively probes directionally averaged elastic moduli. As a direct  
826 consequence of probing a broad spectrum of wavevectors, the Brillouin spectra is broadened as  
827 predicted from the momentum-energy conservation equations describing the scattering  
828 processes. The so-called Brillouin scattering peak position is however not noticeably modified to  
829 within experimental uncertainties, as was verified by reducing the numerical aperture of excitation  
830 and detection on the studied samples using an iris in the beam path.

831 Roots of 7-day old *Arabidopsis* seedlings were scanned at the early EZ, the size of the scan was  
832 25  $\mu\text{m}$  x 25  $\mu\text{m}$  (50 x 50 pixels), step size typically 500 nm (or 250 nm for larger scans) using the  
833 piezo-stage.

#### 834 **Refractive index tomography**

835 Refractive index tomograms were acquired on a holotomographic microscope with rotational  
836 scanning 3D Cell Explorer (Nanolive SA, Lausanne, Switzerland) with Nikon BE Plan 60x NA 0.8.  
837 The size of acquired tomogram was 93.1x93.1x35.7  $\mu\text{m}$  (xyz). Samples were measured in water  
838 (reference refractive index 1.330). Software Steve 1.6.3496 (Nanolive SA) was used for image  
839 acquisition. Subsequent image analysis was performed in ImageJ 1.52q (NIH, USA) on a max  
840 projection of tomography data. Following parameters were extracted: mean refractive index at cell  
841 wall of longitudinal and transverse axes of cell.

#### 842 **Atomic force microscopy (AFM)**

843 Roots of 7-day old *Arabidopsis* seedlings were immobilized on glass slides and surrounded by  
844 stiff agarose. Approximate early EZ was defined based on the visual landmark observed through  
845 a bright field microscope. In order to extract the mechanical properties of only the outer cell wall,  
846 the maximum indentation force was set to 60 nN to archive a maximum indentation of no more  
847 than 80 nm. The cantilever used was “Nano World” (Nanosensors Headquarters, Neuchâtel,  
848 Switzerland) SD-R150-T3L450B tips with a spring constant of 0.15–1.83N/m (the one used was  
849 estimated to be 0.781 N/m) with silicon point probe tips of a 150-nm radius.

850 All force spectroscopy experiments were performed as previously described (Feng *et al.*, 2018;  
851 Peaucelle, 2014; Peaucelle *et al.*, 2015). Briefly, stiffness of samples was determined as follows:  
852 an AFM cantilever loaded with a spherical tip was used to indent the sample over a 60  $\times$  100  $\mu\text{m}$   
853 square area, within the area 60  $\times$  100 measurements were made resulting in 6000 force-  
854 indentation experiments; each force-indentation experiment was treated with a Hertzian  
855 indentation model to extract the apparent Young’s modulus (EA); each pixel in a stiffness map  
856 represents the apparent Young’s modulus from one force-indentation point. The EA was calculated  
857 using the JPK Data Processing software (ver. Spm - 4.0.23, JPK Instruments AG, Germany),  
858 which allows for a more standardized analysis than the estimation of the EA using a standard  
859 Hertzian contact model (Peaucelle, 2014; Peaucelle *et al.*, 2015). Only the retraction curve was  
860 used in our analyses as is typically the case in nano-indentation experiments. A Poisson ratio of

861 0.5 was assumed for the material. Range distribution of EA from 0.2 MPa to 3 MPa in 1-MPa  
862 binned groups was calculated using MATLAB.

### 863 **Statistical analysis**

864 For statistical analyses simple ANOVA and post-hoc Tukey test was used. For pairwise  
865 comparisons in repeated experiments, mixed model ANOVA using random effects for the different  
866 experiments was used with Tukey test as a post-hoc test. In case of non-normal count data (e.g  
867 No. of cells) a Poisson mixed model was used to identify differences between genotypes. For the  
868 implementation of the mixed models the lme4 package in R was used (Bates *et al.*, 2015).

869

### 870 **REFERENCES**

871 **Andriotis, O.G., Elsayad, K., Smart, D.E., Nalbach, M., Davies, D.E. and Thurner, P.J.** (2019)  
872 Hydration and nanomechanical changes in collagen fibrils bearing advanced glycation end-  
873 product. *Biomed Opt Express* 10:1841-1855.

874 **Antonacci, G., Beck, T., Bilenca, A., Czarske, J., Elsayad, K., Guck, J., Kim, K., Krug, B.,**  
875 **Palombo, F., Prevedel, R. and Scarcelli, G.** (2020) Recent progress and current opinions in  
876 Brillouin microscopy for life science applications. *Biophysical Reviews* 12: 615–624.

877 **Ausubel, F., Brent, R., Kingston, R.E., Moore, J.G., Seidman, J.G., Smith, J.A., Struhl, J.G.**  
878 **eds.** (1999) In *Current Protocols in Molecular Biology*, New York: John Wiley.

879 **Balestrini, R., Cosgrove, D.J. and Bonfante, P.** (2005) Differential location of alpha-expansin  
880 proteins during the accommodation of root cells to an arbuscular mycorrhizal fungus. *Planta* 220:  
881 889-899.

882 **Bates, D., Mächler, M., Bolker, B. and Walker, S.** (2015) Fitting linear mixed-effects models  
883 using lme4. *Journal of Statistical Software*, 67: 1-48.

884 **Barbez, E., Dunser, K., Gaidora, A., Lendl, T. and Busch, W.** (2017) Auxin steers root cell  
885 expansion via apoplastic pH regulation in *Arabidopsis thaliana*. *Proc Natl Acad Sci* 114: E4884-  
886 E4893.

887 **Berne, B.J. and Pecora, R. eds.** (2000) Dynamic light scattering, with applications to chemistry,  
888 biology, and physics. New York, NY: Dover Publications.

889 **Bhargava, A., Clabaugh, I., To, J.P., Maxwell, B.B., Chiang, Y.-H., Schaller, G.E., Loraine, A.**  
890 **and Kieber, J.J.** (2013) Identification of cytokinin-responsive genes using microarray meta-  
891 analysis and RNA-Seq in *Arabidopsis*. *Plant Physiol* 162: 272-29.

892 **Braybrook, S. and Jönsson, H.** (2016) Shifting foundations: the mechanical cell wall and  
893 development. *Curr Opin Plant Biol* 29: 115-120.

894 **Braybrook, S.A. and Peaucelle, A.** (2013) Mechano-Chemical aspects of organ formation in  
895 *Arabidopsis thaliana*: The relationship between auxin and pectin. *Plos One* 8.

- 896 **Caderas, D., Muster, M., Vogler, H., Mandel, T., Rose, J.K.C., McQueen-Mason, S. and**  
897 **Kuhlemeier, C.** (2000) Limited correlation between expansin gene expression and elongation  
898 growth rate. *Plant Physiol* 123: 1399-1413.
- 899 **Cho, H.-T. and Cosgrove, D.J.** (2000) Altered expression of expansin modulates leaf growth and  
900 pedicel abscission in *Arabidopsis thaliana*. *Proc Natl Acad Sci* 97: 9783-9788.
- 901 **Cho, H.-T. and Cosgrove, D. J.** (2002) Regulation of root hair initiation and expansin gene  
902 expression in *Arabidopsis*. *Plant Cell* 14: 3237-53.
- 903 **Cho, H.-T. and Kende, H.** (1998) Tissue localization of expansins in deepwater rice. *Plant J* 15:  
904 805-812.
- 905 **Choi, D.S., Lee, Y., Cho, H.-T. and Kende, H.** (2003) Regulation of expansin gene expression  
906 affects growth and development in transgenic rice plants. *Plant Cell* 15: 1386-1398.
- 907 **Cleland, R.** (1971) Cell wall extension. *Ann Rev Plant Physiol* 22: 197-222.
- 908 **Clough, S.J. and Bent, A.F.** (1998) Floral dip: a simplified method for *Agrobacterium*-mediated  
909 transformation of *Arabidopsis thaliana*. *Plant J* 16: 735-43.
- 910 **Cosgrove, D.J., Li, L.C., Cho, H.-T., Hoffmann-Benning, S., Moore, R.C. and Blecker, D.**  
911 (2002) The growing world of expansins. *Plant Cell Physiol* 43: 1436-1444.
- 912 **Cosgrove, D.J.** (2005) Growth of the plant cell wall. *Nat Rev Mol Cell Biol* 6: 850-861.
- 913 **Cosgrove, D.J.** (2014) Re-constructing our models of cellulose and primary cell wall assembly.  
914 *Curr Opin Plant Biol* 22: 122-131.
- 915 **Cosgrove, D.J.** (2018) Nanoscale structure, mechanics and growth of epidermal cell walls. *Curr*  
916 *Opin Plant Biol* 46: 77-86.
- 917 **Cosgrove, D.J.** (2018b) Diffuse growth of plant cell walls. *Plant Physiol* 176: 16-27.
- 918 **Craft, J., Samalova, M., Baroux, C., Townley, H., Martinez, A., Jepson, I., Tsiantis, M. and**  
919 **Moore, I.** (2005) New pOp/LhG4 vectors for stringent glucocorticoid-dependent transgene  
920 expression in *Arabidopsis*. *Plant J* 41: 899-918.
- 921 **Dello Iorio, R., Linhares, F.S., Scacchi, E., Casamitjana-Martinez, E., Heidstra, R., Costantino,**  
922 **P. and Sabatini, S.** (2007) Cytokinins determine *Arabidopsis* root-meristem size by controlling  
923 cell differentiation. *Curr Biol* 17: 678-682.
- 924 **Dello Iorio, R., Linhares, F.S. and Sabatini, S.** (2008) Emerging role of cytokinin as a regulator  
925 of cellular differentiation. *Curr Opin Plant Biol* 11: 23-27.
- 926 **Didi, V., Jackson, P. and Hejatko, J.** (2015) Hormonal regulation of secondary cell wall  
927 formation. *J Exp Bot* 66: 5015-27.
- 928 **Di Mambro, R., De Ruvo, M., Pacifici, E., Salvi, E., Sozzani, R., Benfey, P.N., Busch, W.,**  
929 **Novak, O., Ljung, K., Di Paola, L., Marée, A.F.M., Costantino, P., Grieneisen, V.A. and**  
930 **Sabatini, S.** (2017) Auxin minimum triggers the developmental switch from cell division to cell  
931 differentiation in the *Arabidopsis* root. *Proc Natl Acad Sci* 114: E7641-E7649.

- 932 **Di Mambro, R., Svolacchia, N., Dello Iorio, R., Pierdonati, E., Salvi, E., Pedrazzini, E., Vitale,**  
933 **A., Perilli, S., Sozzani, R., Benfey, P.N., Busch, W., Costantino, P. and Sabatini, S.** (2019)  
934 The lateral root cap acts as an auxin sink that controls meristem size. *Curr Biol* 29: 1199–1205.
- 935 **Edrei, E., Gather, M.C. and Scarcelli, G.** (2017) Adaptive optics in spectroscopy and densely  
936 labeled-fluorescence applications. *Optics Express* 26: 33865-33877.
- 937 **Elsayad, K., Werner, S., Gallemí, M., Kong, J., Sánchez Guajardo, E.R., Zhang, L., Jaillais,**  
938 **Y., Greb, T. and Belkhadir, Y.** (2016) Mapping the subcellular mechanical properties of live cells  
939 in tissues with fluorescence emission–Brillouin imaging. *Science Signaling* 435: rs5.
- 940 **Elsayad, K.** (2019) Spectral phasor analysis for Brillouin microspectroscopy. *Front Phys* 7:62.
- 941 **Elsayad, K., Polakova, S. and Gregan, J.** (2019) Probing mechanical properties in biology using  
942 Brillouin microscopy. *Trends in Cell Biol* 8: 608-611.
- 943 **Engler, A.J., Sen, S., Sweeney, H.L. and Discher, D.E.** (2006) Matrix elasticity directs stem cell  
944 lineage specification *Cell* 126: 677-689.
- 945 **Feng, W., Kita, D., Peaucelle, A., Cartwright, H.N., Doan, V., Duan, Q., Liu, M.C., Maman, J.,**  
946 **Steinhorst, L., Schmitz-Thom, I., Yvon, R., Kudla, J., Wu, H.M., Cheung, A.Y. and Dinneny,**  
947 **J.R.** (2018) The FERONIA receptor kinase maintains cell-wall integrity during salt stress through  
948 Ca<sup>2+</sup> signaling. *Curr Biol* 28: 666-675.
- 949 **Fleming, A. J., McQueen-Mason, S., Mandel, T. and Kuhlemeier, C.** (1997) Induction of leaf  
950 primordia by the cell wall protein expansin. *Science* 276: 1415-1418.
- 951 **Freese, N.H., Norris, D.C. and Loraine, A.E.** (2016) Integrated Genome Browser: Visual  
952 analytics platform for genomics. *Bioinformatics* 32: 2089-2095.
- 953 **Geitmann, A. and Ortega, J.K.E.** (2009) Mechanics and modeling of plant cell growth. *Trends*  
954 *Plant Sci* 14: 467-478.
- 955 **Georgelis, N., Tabuchi, A., Nikolaidis, N. and Cosgrove, D.J.** (2011) Structure-function analysis  
956 of the bacterial expansin EXLX1. *J Biol Chem* 286: 16814-16823.
- 957 **Gigli-Bisceglia, N., Engelsdorf, T., Strnad, M., Vaahtera, L., Khan, G.A., Yamoune, A.,**  
958 **Alipanah, L., Novak, O., Persson, S., Hejatko, J. and Hamann, T.** (2018) Cell wall integrity  
959 modulates *Arabidopsis thaliana* cell cycle gene expression in a cytokinin- and nitrate reductase-  
960 dependent manner. *Development* 145: dev166678.
- 961 **Goh, H.H., Sloan, J., Malinowski, R. and Fleming, A.** (2014) Variable expansin expression in  
962 *Arabidopsis* leads to different growth responses. *J Plant Physiol* 171: 329-339.
- 963 **Gouveia, R.M., Lepert, G., Gupta, S., Mohan, R.R., Paterson, C. and Connon, C.J.** (2019)  
964 Assessment of corneal substrate biomechanics and its effect on epithelial stem cell maintenance  
965 and differentiation. *Nat Commun* 10: 1496.
- 966 **Gruel, J., Landrein, B., Tarr, P., Schuster, C., Refahi, Y., Sampathkumar, A., Hamant, O.,**  
967 **Meyerowitz, E.M. and Jonsson, H.** (2016) An epidermis-driven mechanism positions and scales  
968 stem cell niches in plants. *Sci Adv* 2: e1500989.

- 969 **Haas, K.T., Wightman, R., Meyerowitz, E.M. and Peaucelle, A.** (2020) Pectin  
970 homogalacturonan nanofilament expansion drives morphogenesis in plant epidermal cells.  
971 *Science* 367: 1003-1007.
- 972 **Hager, A., Menzel, H. and Krauss, A.** (1971) Versuche und Hypothese zur Primarwirkung des  
973 Auxin beim Streckungswachstum. *Planta* 100: 47–75.
- 974 **Hamant, O., Heisler, M.G., Jonsson, H., Krupinski, P., Uyttewaal, M., Bokov, P., Corson, F.,  
975 Sahlin, P., Boudaoud, A., Meyerowitz, E.M., Couder, Y. and Traas, J.** (2008) Developmental  
976 patterning by mechanical signals in *Arabidopsis*. *Science* 322: 1650-1655.
- 977 **Hamant, O. and Traas, J.** (2010) The mechanics behind plant development. *New Phytol* 185:  
978 369-385.
- 979 **Hamant, O., Inoue, D., Bouchez, D., Dumais, J. and Mjolsness, E.** (2019) Are microtubules  
980 tension sensors? *Nat Commun* 10: 2360.
- 981 **Hervieux, N., Tsugawa, S., Fruleux, A., Dumond, M., Routier-Kierzkowska, A.L.,  
982 Komatsuzaki, T., Boudaoud, A., Larkin, J.C., Smith, R.S., Li, C.B. and Hamant, O.** (2017)  
983 Mechanical shielding of rapidly growing cells buffers growth heterogeneity and contributes to  
984 organ shape reproducibility. *Curr Biol* 27: 3468-3479.
- 985 **Hurny, A., Cuesta, C., Cavallari, N., Otvos, K., Duclercq, J., Dokladal, L., Montesinos, J.C.,  
986 Gallemi, M., Semeradova, H., Rauter, T., Stenzel, I., Persiau, G., Benade, F., Bhalearo, R.,  
987 Sykorova, E., Gorzsas, A., Sechet, J., Mouille, G., Heilmann, I., De Jaeger, G., Ludwig-Muller,  
988 J. and Benkova, E.** (2020) SYNERGISTIC ON AUXIN AND CYTOKININ 1 positively regulates  
989 growth and attenuates soil pathogen resistance. *Nat Commun* 11: 2170.
- 990 **Ilias, I.A., Negishi, K., Yasue, K., Jomura, N., Morohashi, K., Baharum, S. N. and Goh, H.-H.**  
991 (2019) Transcriptome-wide effects of expansin gene manipulation in etiolated *Arabidopsis*  
992 seedling. *J Plant Res* 132: 159-172.
- 993 **Landrein, B., Kiss, A., Sassi, M., Chauvet, A., Das, P., Cortizo, M., Laufs, P., Takeda, S., Aida,  
994 M., Traas, J., Vernoux, T., Boudaoud, A. and Hamant, O.** (2015) Mechanical stress contributes  
995 to the expression of the *STM* homeobox gene in *Arabidopsis* shoot meristems. *eLife* 4: e07811.
- 996 **Lee, D.J., Park, J.-Y., Ku, S.-J., Ha, J.-M., Kim, S., Kim, M.D., Oh, M.-H. and Kim, J.** (2007)  
997 Genome-wide expression profiling of *ARABIDOPSIS RESPONSE REGULATOR 7 (ARR7)*  
998 overexpression in cytokinin response. *Mol Genet Genom* 277: 115-137.
- 999 **Lee, H.W. and Kim, J.** (2013) *EXPANSINA17* up-regulated by *LBD18/ASL20* promotes lateral  
1000 root formation during the auxin response. *Plant Cell Physiol* 54: 1600-11.
- 1001 **Li, Y., Darley, C.P., Ongaro, V., Fleming, A., Schipper, O., Baldauf, S.L. and McQueen-  
1002 Mason, S.J.** (2002) Plant expansins are a complex multigene family with an ancient evolutionary  
1003 origin. *Plant Physiol* 128: 854-864.
- 1004 **Livak, K.J. and Schmittgen, T.D.** (2001) Analysis of relative gene expression data using real-  
1005 time quantitative PCR and the 2(-Delta Delta C(T)) method. *Methods* 25: 402-408.

- 1006 **Majda, M., Gronos, P., Sintorn, I.M., Vain, T., Milani, P., Krupinski, P., Zagorska-Marek, B.,**  
1007 **Viotti, C., Jonsson, H., Mellerowicz, E.J., Hamant, O. and Robert, S.** (2017) Mechanochemical  
1008 polarization of contiguous cell walls shapes plant pavement cells. *Dev Cell* 43: 290-300.
- 1009 **McQueen-Mason, S., Durachko, D.M. and Cosgrove, D.J.** (1992) Two endogenous proteins  
1010 that induce cell wall extension in plants. *Plant Cell* 4:1425-33.
- 1011 **McQueen-Mason, S. and Cosgrove, D.J.** (1994) Disruption of hydrogen bonding between plant  
1012 cell wall polymers by proteins that induce wall extension. *Proc Natl Acad Sci* 91: 6574-6578.
- 1013 **McQueen-Mason S. and Cosgrove, D.J.** (1995) Expansin mode of action on cell walls: analysis  
1014 of wall hydrolysis, stress relaxation, and binding. *Plant Physiol* 107: 87-100.
- 1015 **Murashige, T. and Skoog, F.** (1962) A revised medium for rapid growth and bioassays with  
1016 tobacco tissue. *Physiol Plant* 15: 493-497.
- 1017 **O'Malley, R.C., Huang, S.C., Song, L., Lewsey, M.G., Bartlett, A., Nery, J.R., Galli, M.,**  
1018 **Gallavotti, A. and Ecker, J.R.** (2016) Cistrome and epicistrome features shape the regulatory  
1019 DNA landscape. *Cell* 165:1280-1292.
- 1020 **Pacifici, E., Di Mambro, R., Dello Iorio, R., Costantino, P. and Sabatini, S.** (2018) Acidic cell  
1021 elongation drives cell differentiation in the *Arabidopsis* root. *EMBO J* 37: e99134.
- 1022 **Palombo, F., Winlove, C.P., Edginton, R.S., Green, E., Stone, N., Caponi, S., Madami, M. and**  
1023 **Fiochetto, D.** (2014) Biomechanics of fibrous proteins of the extracellular matrix studied by Brillouin  
1024 scattering. *J Royal Society Interface* 11: 20140739.
- 1025 **Park, S. H., Li, F., Renaud, J., Shen, W., Li, Y., Guo, L., Cui, H., Sumarah, M. and Wang, A.**  
1026 (2017) NbEXPA1, an  $\alpha$ -expansin, is plasmodesmata-specific and a novel host factor for potyviral  
1027 infection. *Plant J* 92: 846–886.
- 1028 **Peaucelle, A., Louvet, R., Johansen, J.N., Höfte, H., Laufs, P., Pelloux, J. and Mouille, G.**  
1029 (2008) *Arabidopsis* phyllotaxis is controlled by the methyl-esterification status of cell-wall pectins.  
1030 *Curr Biol* 18: 1943-1948.
- 1031 **Peaucelle, A., Braybrook, S.A., Le Guillou, L., Bron, E., Kuhlemeier, C. and Höfte, H.** (2011)  
1032 Pectin-induced changes in cell wall mechanics underlie organ initiation in *Arabidopsis*. *Curr Biol*  
1033 21: 1720-1726.
- 1034 **Peaucelle, A.** (2014) AFM-based mapping of the elastic properties of cell walls: at tissue, cellular,  
1035 and subcellular resolutions. *J Vis Exp* 89: 51317.
- 1036 **Peaucelle, A., Wightman, R. and Höfte, H.** (2015) The control of growth symmetry breaking in  
1037 the *Arabidopsis* hypocotyl. *Curr Biol* 25:1746-1752.
- 1038 **Pien, S., Wyrzykowska, J., McQueen-Mason, S., Smart, C. and Fleming, A.** (2001) Local  
1039 expression of expansin induces the entire process of leaf development and modifies leaf shape.  
1040 *Proc Natl Acad Sci* 98: 11812-11817.
- 1041 **Prevedel, R., Diz-Munoz, A., Ruocco, G. and Antonacci, G.** (2019) Brillouin microscopy: an  
1042 emerging tool for mechanobiology. *Nat Methods* 16: 969-977.

- 1043 **Ramakrishna, P., Ruiz Duarte, P., Rance, G.A., Schubert, M., Vordermaier, V., Dai Vue, L.,**  
1044 **Murphy, E., Vilches Barro, A., Swarup, K., Moirangthema, K., Jørgenseni, B., van de Cotte,**  
1045 **B., Goh, T., Lin, Z., Voss, U., Beeckman, T., Bennett, M.J., Gevaert, K., Maizel, A. and De**  
1046 **Smet, I.** (2019) EXPANSIN A1-mediated radial swelling of pericycle cells positions anticlinal cell  
1047 divisions during lateral root initiation. *Proc Natl Acad Sci* 116: 8597–8602.
- 1048 **Rebocho, A.B., Southam, P., Kennaway, J.R., Bangham, J.A. and Coen, E.** (2017) Generation  
1049 of shape complexity through tissue conflict resolution. *eLife* 6: e20156.
- 1050 **Reinhardt, D., Wittwer, F., Mandel, T. and Kuhlemeier, C.** (1998) Localized upregulation of a  
1051 new expansin gene predicts the site of leaf formation in the tomato meristem. *Plant Cell* 10: 1427-  
1052 1437.
- 1053 **Ribas, A., Volpi de Silva, N., Santos, T., Abrantes, F., Custodio, C., Machado Neto, N. and**  
1054 **Vieira, L.** (2019). Regulation of  $\alpha$ -expansins genes in *Arabidopsis thaliana* seeds during post-  
1055 osmopriming germination. *Physiol Mol Biol Plants* 25: 511–522.
- 1056 **Sanchez-Montesino, R., Bouza-Morcillo, L., Marquez, J., Ghita, M., Duran-Nebreda, S.,**  
1057 **Gomez, L., Holdsworth, M.J., Basse, I.G. and Onate-Sanchez, L.** (2019) A regulatory module  
1058 controlling GA-mediated endosperm cell expansion is critical for seed germination in *Arabidopsis*.  
1059 *Mol Plant* 12: 71–85.
- 1060 **Samalova, M., Brzobohaty, B. and Moore, I.** (2005) pOp6/LhGR: a stringently regulated and  
1061 highly responsive dexamethasone-inducible gene expression system for tobacco. *Plant J* 41: 919-  
1062 935.
- 1063 **Samalova, M., Melida, H., Vilaplana, F., Bulone, V., Soanes, D.M., Talbot, N.J. and Gurr, S.J.**  
1064 (2017) The  $\beta$ -1,3-glucanosyltransferases (Gels) affect the structure of the rice blast fungal cell wall  
1065 during appressorium-mediated plant infection. *Cell Microbiol* 19: e12659.
- 1066 **Samalova, M., Kirchhelle, C. and Moore, I.** (2019) Universal methods for transgene induction  
1067 using the dexamethasone-inducible transcription activation system pOp6/LhGR in *Arabidopsis*  
1068 and other plant species. *Current Protocols in Plant Biol* 4: e20089.
- 1069 **Sampathkumar, A., Krupinski, P., Wightman, R., Milani, P., Berquand, A., Boudaoud, A.,**  
1070 **Hamant, O., Jonsson, H. and Meyerowitz, E.M.** (2014) Subcellular and supracellular mechanical  
1071 stress prescribes cytoskeleton behavior in *Arabidopsis* cotyledon pavement cells. *eLife* 3: e01967.
- 1072 **Sampedro, J. and Cosgrove, D.J.** (2005) The expansin superfamily. *Genome Biol* 6: 242.
- 1073 **Sassi, M. and Trass, J.** (2015) When biochemistry meets mechanics: a systems view of growth  
1074 control in plants. *Curr Opin Plant Biol* 28: 137-143.
- 1075 **Scarcelli, G. and Yun, S.H.** (2007) Confocal Brillouin microscopy for three-dimensional  
1076 mechanical imaging. *Nat Photonics* 2: 39-43.
- 1077 **Scarcelli, G., Polacheck, W.J., Nia, H.T., Patel, K., Grodzinsky, A.J., Kamm, R.D. and Yun,**  
1078 **S.H.** (2015) Noncontact three-dimensional mapping of intracellular hydromechanical properties by  
1079 Brillouin microscopy. *Nat Methods* 12: 1132-1134.



- 1080 **Shaner, N.C., Campbell, R.E., Steinbach, P.A., Giepmans, B.N.G., Palmer, A.E. and Tsien,**  
1081 **R.Y. (2004)** Improved monomeric red, orange and yellow fluorescent proteins derived from  
1082 *Discosoma* sp. red fluorescent protein. *Nat Biotechnol* 22: 1567-1572.
- 1083 **Shimada, T. L., Shimada, T. and Hara-Nishimura, I. (2010)** A rapid and non-destructive  
1084 screenable marker, FAST, for identifying transformed seeds of *Arabidopsis thaliana*. *Plant J* 61:  
1085 519–528.
- 1086 **Takatani, S., Verger, S., Okamoto, T., Takahashi, T., Hamant, O. and Motose, H. (2020)**  
1087 Microtubule response to tensile stress is curbed by NEK6 to buffer growth variation in the  
1088 *Arabidopsis* hypocotyl. *Curr Biol* 30: 1491-1503.
- 1089 **Takatsuka, H., Higaki, T. and Umeda, M. (2018)** Actin reorganization triggers rapid cell  
1090 elongation in roots. *Plant Physiol* 178: 1130-1141.
- 1091 **Taniguchi, M., Sasaki, N., Tsuge, T., Aoyama, A. and Oka, A. (2007)** ARR1 directly activates  
1092 cytokinin response genes that encode proteins with diverse regulatory functions. *Plant Cell Physiol*  
1093 48: 263-277.
- 1094 **Uyttewaal, M., Burian, A., Alim, K., Landrein, B., Borowska-Wykret, D., Dedieu, A.,**  
1095 **Peaucelle, A., Ludynia, M., Traas, J., Boudaoud, A., Kwiatkowska, D. and Hamant, O. (2012)**  
1096 Mechanical stress acts via katanin to amplify differences in growth rate between adjacent cells in  
1097 *Arabidopsis*. *Cell* 149: 439-451.
- 1098 **Vermeer, J.E., von Wangenheim, D., Barberon, M., Lee, Y., Stelzer, E.H., Maizel, A. and**  
1099 **Geldner, N. (2014)** A spatial accommodation by neighboring cells is required for organ initiation  
1100 in *Arabidopsis*. *Science* 343: 178-183.
- 1101 **Vogler, H., Caderas, D., Mandel, T. and Kuhlemeier, C. (2003)** Domains of expansin gene  
1102 expression define growth regions in the shoot apex of tomato. *Plant Mol Biol* 53: 267-272.
- 1103 **Wang, X. and Cosgrove, D.J. (2020)** Pectin methylesterase selectively softens the onion  
1104 epidermal wall yet reduces acid-induced creep. *J Exp Bot* 71: 2629-2640.
- 1105 **Wang, T., Park, Y.B., Caporini, M.A., Rosay, M., Zhong, L., Cosgrove, D.J. and Hong, M.**  
1106 **(2013)** Sensitivity-enhanced solid-state NMR detection of expansin's target in plant cell walls. *Proc*  
1107 *Natl Acad Sci* 110: 16444-16449.
- 1108 **Weijers D., Franke-van Dijk, M., Vencken, R. J., Quint, A., Hooykaas, P. and Offringa, R.**  
1109 **(2001)** An *Arabidopsis* Minute-like phenotype caused by a semi-dominant mutation in a  
1110 *RIBOSOMAL PROTEIN S5* gene. *Development* 128: 4289-4299.
- 1111 **Willis, L., Refahi, Y., Wightman, R., Landrein, B., Teles, J., Huang, K.C., Meyerowitz, E.M.**  
1112 **and Jönsson, H. (2016)** Cell size and growth regulation in the *Arabidopsis thaliana* apical stem  
1113 cell niche. *Proc Natl Acad Sci* 113: E8238-E8246.
- 1114 **Wolf, S., Hematy, K. and Hofte, H. (2012)** Growth control and cell wall signaling in plants. *Annu*  
1115 *Rev Plant Biol* 63: 381-407.

1116 **Wu, P.-J., Kabakova, I.V., Ruberti, J.W., Sherwood, J.M., Dunlop, I.E., Paterson, C., Torok,**  
1117 **P. and Overby, D.R.** (2018) Water content, not stiffness, dominates Brillouin spectroscopy  
1118 measurements in hydrated materials. *Nat Methods* 15: 561-562.

1119 **Xiao et al. IEEE Journal of Quantum Electronics (2014)**

1120 **Xie, M., Chen, H., Huang, L., O'Neil, R.C., Shokhirev, M.N. and Ecker, J.R.** (2018) A B-ARR-  
1121 mediated cytokinin transcriptional network directs hormone cross-regulation and shoot  
1122 development. *Nat Commun* 9:1604.

1123 **Yang, C., DelRio, F.W., Ma, H., Killaars, A.R., Basta, L.P., Kyburz, K.A. and Anseth, K.S.**  
1124 (2016) Spatially patterned matrix elasticity directs stem cell fate. *Proc Natl Acad Sci* 113: E4439-  
1125 4445.

1126 **Yuan, S., Wu, Y. and Cosgrove, D.J.** (2001) A fungal endoglucanase with plant cell wall  
1127 extension activity. *Plant Physiol* 127: 324-333.

1128 **Zenoni, S., Fasoli, M., Tornielli, G.B., Dal Santo, S., Sanson, A., de Groot, P., Sordo, S.,**  
1129 **Citterio, S., Monti, F. and Pezzotti, M.** (2011) Overexpression of *PhEXPA1* increases cell size,  
1130 modifies cell wall polymer composition and affects the timing of axillary meristem development in  
1131 *Petunia hybrida*. *New Phytol* 191: 662-677.

1132 **Zhang, N. and Hasenstein, K.H.** (2000) Distribution of expansins in graviresponding maize roots.  
1133 *Plant Cell Physiol* 41: 1305-1312.

1134 **Zhang, T., Mahgoudy-Louyeh, S., Tittmann, B. and Cosgrove, D.J.** (2014) Visualization of  
1135 the nanoscale pattern of recently-deposited cellulose microfibrils and matrix materials in never-  
1136 dried primary walls of the onion epidermis. *Cellulose* 21: 853-862.

1137 **Zhao, H., Brown, P.H. and Schuck, P.** (2011) On the distribution of protein refractive index  
1138 increments. *Biophys J* 100: 2309-2317.

1139 **Zubo, Y.O, Clabaugh Blakley, I., Yamburenko, M.V., Worthen, J.M., Street, H.S., Franco-**  
1140 **Zorrilla, J.M., Zhang, W., Hill, K., Raines, T., Solano, S., Kieber, J.J., Loraine, A.E. and**  
1141 **Schaller, G.E.** (2017) Cytokinin induces genome-wide binding of the type-B response regulator  
1142 ARR10 to regulate growth and development in *Arabidopsis*. *Proc Natl Acad Sci* 114: E5995-  
1143 E6004.

1144

## 1145 **SUPPLEMENTARY MATERIALS AND METHODS**

### 1146 **Plasmolysis experiment**

1147 *Arabidopsis* seedlings of a plasma membrane marker PM-YFP pUBQ10::YFP-PIP1;4 (von  
1148 Wangenheim *et al.*, 2016) were immersed into 10% solution of sorbitol for cca 10 min.

### 1149 **EXPA1 mutant lines**

1150 Knock-out plants of *EXPA1* were obtained from the Nottingham Arabidopsis Stock Centre  
1151 collection (SALK\_010506). Homozygous mutant lines from the Salk T-DNA were identified by PCR  
1152 as described (<http://signal.salk.edu/>) in the next generation of seedlings and designated as *exp1-*

1153 1,4 and *exp1-1,9*. A second mutant line *exp1-2* generated using the CRISPR/Cas9 and its  
1154 corresponding WT (WT crispr) was a gift from Ive De Smet (Ramakrishna *et al.*, 2019).

1155 AmiEX1 lines based on artificial microRNAs (amiRNAs, miR319a) were designed using the WMD3  
1156 Web MicroRNA Designer (WeigelWorld.org) and the PHANTOM database of family targeting  
1157 amiRNAs (Hauser *et al.*, 2013). The amiRNA sequence engineered for *EXPA1* (*At1g69530*) as  
1158 well as expansins *EXPA14* (*At5g56320*) and *EXPA15* (*At2g03090*) is  
1159 "TGTTACACCAACCTGCGGCGT". We used primers I-IV summarised in Supp. Table 1 to  
1160 generate PCR fragments that were joined together by overlapping PCR using pRS300 vector as  
1161 a template (see WeigelWorld.org for details). The final product was cloned into the Dex-inducible  
1162 pOp6/LhGR vector pOpOn2.1 (Craft *et al.*, 2005; Samalova *et al.*, 2019) using primers V and VI  
1163 and GATAWAY™ cloning strategy. Seedlings of selected T3 homozygous lines were used in the  
1164 experiments.

1165 **Supp. Table1: Primes used for cloning of amiEX1 (p35S>GR>amiRNA EXPA1, 14, 15)**

| Name                              | No. | Sequence (5' – 3')                                                |
|-----------------------------------|-----|-------------------------------------------------------------------|
| miR-s                             | I   | gaTGTTACACCAACCTGCGGCGTtctctctttgtattcc                           |
| miR-a                             | II  | gaACGCCGCAGGTTGGTGTAAACAtcaaagagaatcaatga                         |
| miR*s                             | III | gaACACCGCAGGTTGCTGTAACtccacaggctcgtgatg                           |
| miR*a                             | IV  | gaAGTTACAGCAACCTGCGGTGTtctacatatattcct                            |
| attB1- <u>EcoRI</u> -<br>amiRNA-F | V   | GGGGACAAGTTTGTACAAAAAAGCAGGCTTCGAATTCCTGC<br>AGCCc aaacacacgctcgg |
| attB2- <u>BamH</u> -<br>amiRNA-R  | VI  | GGGGACCACTTTGTACAAGAAAGCTGGGTCCGATCCCCca<br>tggc gatgcc           |

1166

1167

## 1168 SUPPLEMENTARY REFERENCES

1169 **Hauser, F., Chen, W., Deinlein, U., Chang, K., Ossowski, S., Fitz, J., Hannon, G.J., and**  
1170 **Schroeder, J.I.** (2013) A genomic-scale artificial microRNA library as a tool to investigate the  
1171 functionally redundant gene space in *Arabidopsis*. *Plant Cell* 25: 2848–2863.

1172 **Ursache, R., Andersen, T.G., Marhavy, P. and Geldner, N.** (2018) A protocol for combining  
1173 fluorescent proteins with histological stains for diverse cell wall components. *Plant J* 93: 399-412.

1174 **Von Wangenheim, D., Fangerau, J., Schmitz, A., Smith, R.S., Leitte, H., Stelzer, E.H. and**  
1175 **Maizel, A.** (2016) Rules and self-organizing properties of post-embryonic plant organ cell division  
1176 patterns. *Curr Biol* 26: 439-49.

1177
